# Supplementary material for: Single-cell whole-genome sequencing reveals the functional landscape of somatic mutations in B lymphocytes across the human lifespan
Source: PubMed Central journal article supplement — Proc Natl Acad Sci U S A. 2019 Apr 16;116(18):9014–9. doi: 10.1073/pnas.1902510116 (PMC6500118; doi:10.1073/pnas.1902510116), 2019-04-16
Supplement: pnas.1902510116.sapp.pdf [file pnas.1902510116.sapp.pdf]

## Supplementary Information for

Single-cell whole-genome sequencing reveals the functional landscape of somatic mutations in B lymphocytes across the human lifespan

Lei Zhang, Xiao Dong, Moonsook Lee, Alexander Y. Maslov, Tao Wang, Jan Vijg

Corresponding to Jan Vijg  
Email: [jan.vijg@einstein.yu.edu](mailto:jan.vijg@einstein.yu.edu)

### **This PDF file includes:**

Supplementary text  
References for SI reference citations  
Figs. S1 to S15  
Tables S1 to S7

## Supplementary Information Text

**Alignment for whole-genome sequencing.** For each single cell or bulk sample, sequencing reads were adapter- and quality-trimmed using Trim Galore (version 0.3.7). Reads before and after trimming were subjected to quality checking using FastQC (version 0.11.4). The trimmed reads were aligned to the human reference genome (build 37) using BWA MEM (version 0.7.10) (1). Sequence duplications were removed using samtools (version 0.1.19) (2). The alignment was further indel-realigned based on known indels from the 1000 Genomes Project (phase I) (3), and their base quality scores were recalibrated based on known indels from the 1000 Genomes Project (phase I) and SNVs from dbSNP (build 144), both using GATK (version 3.5.0) (4). The somewhat uneven depth of the reads across the genome for the single cells as compared to bulk DNA is due to some level of locus bias of the MDA reaction (SI Appendix, Table S1). This is well-documented (5), but does not affect variant calling with SCcaller (6).

**Calling somatic SNVs.** We used SCcaller (version 1.2) for identifying somatic mutations following its online instructions (<https://github.com/biosinodx/SCcaller>), requiring a minimum 20x sequencing depth and at least 4 reads containing the mutation (6). As illustrated in the previous paper, the SCcaller identify somatic mutations from single cells by filtering out potential amplification artifacts. The filtering is based on a kernel smoother for estimating local allelic amplification bias and a likelihood ratio test to separate three models, one for heterozygous mutation, one for homozygous mutation and the other for the potential artifacts, at every locus. Because the SCcaller requires heterozygous SNPs to correct for allelic amplification bias, we only called mutations on autosomes. The heterozygous SNPs were identified in the bulk whole genome sequences using haplotypecaller of GATK. All somatic SNVs were called only in regions of at least 20x depth. The frequency of somatic SNVs per cell was estimated after normalizing genomic coverage ( $\geq 20x$ ) and sensitivity.

**Estimating sensitivity of SNV calling.** The sensitivity of *de novo* mutation calling in the single cells was estimated as the ratio of the number of heterozygous SNPs detected in single cells to the total number of heterozygous SNPs detected in bulk DNA, at a minimum sequencing depth of 20x in both single cells and bulk (SI Appendix, Table S3).

**Estimating specificity of SNV calling.** To validate variant calling, we performed Sanger sequencing on 20 randomly selected variants, 30 variants located at mutation clusters at immunoglobulin H chain and immunoglobulin L chain genes and 15 recurrent variants (identified in more than one cells) from the 56 single B lymphocytes.

**Detection of clonal hematopoiesis (CHIP) from bulk sequencing.** Besides looking at recurrent mutations from single cells, we also search from bulk sequencing for possible somatic CHIP mutations with variant allele frequencies significantly less than germline at 50%. First, candidate variants from bulk sequencing (the majority of which are germline) were called using GATK (version 3.5.0) (4), HaplotypeCaller (option: `-stand_call_conf 30 -stand_emit_conf 10`) without additional stringent filtering to include as many candidates as possible. Second, we annotated the candidate variants with ANNOVAR (7). Third, using the ANNOVAR's annotations, we compared our variants with the CHIP variant provided by ref (8), and kept any overlapping ones. Finally, we tested if any of the remaining variants has a variant allele frequency significantly differentiate from germline (50%) according to the method described in ref (8). None of the variants was observed in the genes associated with CHIP (8).

**Detection of mutational hotspots.** For detecting potential hotspot regions, we pooled the mutations identified in the 56 single B cells, in total 30,426 SNVs. We then applied the “shower” method using R package “ClusteredMutations” (9-11), requiring a minimum of 4 mutations within a distance that is less than or equal to 5kb. The average distance between two random, neighboring mutations is ~100kb. To calculate the false discovery rate (FDR) of the hotspots identified, we randomly distributed the 30,426 SNVs across the genome and applied the same criteria to discover potential hotspots to calculate the chance of false positives. This random process was repeated 2,000 times and resulted in the FDR estimations provided in SI Appendix, Table S4.

**Analyzing non-immunoglobulin mutation hotspots.** We annotated the 19 non-immunoglobulin hotspots through ENSEMBLE, ENCODE and by searching the literature. Eight of the 19 off-target hotspots (42%) were previously reported being off-target SHM hotspots in B cell-related cancers in humans or mice (SI Appendix, Table S4), with 6 of the 19 (32%) overlapping with specific TF binding sites, including E-Box binding regions, YY1 or C/EBP target regions associated with AID binding (SI Appendix, Table S4) (12). Using ATAC sequencing of B cells collected from two of our donors, we found the off-target hotspots significantly more likely to be in or close to (<1kb) open chromatin regions (3.8-fold more likely than random,  $P=0.003$  with 2,000 permutations). We also found that significantly more off-target hotspots were close to transcription start sites (TSS; <1kb, 3.3-fold more likely than random, Monte Carlo  $P=0.013$  with 2,000 permutations). A full annotation of all hotspots is provided as SI Appendix, Table S4.

**The “outlier” cell.** A SHM+ B cell from the 52-year old donor has a substantially higher mutation frequency than any other cell in this study (Fig. 1a). This cell has a stop codon loss of gene *HIST1H1E*, which is one of the most frequently mutated genes found in human lymphoma (13, 14). When performing the regression analysis in SI Appendix, Fig. S10a, we excluded this cell because it is the only SHM+ cell sequenced of the 52-year donor and is unlikely to be representative for mutation frequency of healthy SHM+ cells of this donor. However, this cell was included in all the other analyses in our study because in all the other analyses, this cell is not the only cell representing one donor or one group.

**Identifying CSR.** CSR can be identified as depletions of both IGHM and IGHD loci in the genome (15). We first calculated the sequencing depths of the IGHM and IGHD loci as the average sequencing depths of all base pairs of the loci for every single B cell. We then calculated normalized depths as the ratio of the sequencing depths to genome-wide average sequencing depths of the same cells. To reliably distinguish CSR+ and CSR- cells, we applied an unsupervised method on the normalized depths as follows. We performed a principal component analysis (PCA) on the normalized depths of the two loci. All cells clearly separated into two groups based on values of the first principle component (PC1 in SI Appendix, Fig. S9a). We then modeled the distribution of PC1 values as a mixture of two normal distributions estimated using an Expectation–Maximization algorithm from R package “mixtools” (SI Appendix, Fig. S9b) (16). Posterior probabilities of every single cell as a member of either of the two normal distributions were calculated using the same R package (SI Appendix, Fig. S9c). Based on the posterior probabilities, we distinguished CSR+ and CSR- cells as indicated in SI Appendix, Fig. S9c.

**Analysis of mutation spectra of the affected bases.** The mutation spectra of human B lymphocytes were found to be dominated by mutations at cytosines and guanines and to differ significantly from those of the dermal fibroblasts analyzed previously (SI Appendix, Fig. S11a) (6). More GC>AT transitions were observed in the B lymphocytes than in the fibroblasts (21%), with GC>AT transitions overall significantly more dominant in B lymphocytes from the newborns (66%) than in those from the other age groups (44% to 47%;  $P=2.18 \times 10^{-9}$ , t-test, two-tailed).

Since the GC>AT transition is the major fraction of the spectra, we tested the correlation of CpG methylation and mutation frequency because cytosine in CpG dinucleotides is prone to deamination and methylated CpG is even more vulnerable without the protection of uracil glycosylase (17). CpG methylation data at single cytosine resolution as determined by whole-genome bisulfite sequencing of adult B lymphocytes (CD19+) was obtained from the ENCODE (Table S5; see the following paragraph). We found a significantly higher number of mutations at methylated CpGs than what would be expected by chance alone (SI Appendix, Fig. S11b). These results are similar to what has been found for germline mutations and somatic mutations in human tumors (18, 19).

To analyze mutations in relation to methylated cytosines, we used data from ENCODE. Raw sequencing reads of whole-genome bisulfite sequencing of B cells (CD19+) of a 37yr old male donor were downloaded from ENCODE database (<https://www.encodeproject.org/experiments/ENCSR284TCU>) and were adapter and quality-trimmed using Trim Galore (version 0.3.7). Reads before and after trimming were subjected to quality checking using FastQC (version 0.11.4). First and second end of trimmed reads were aligned to the human reference genome (GRCh37.73) using Bismark (version 0.14.4) with the alignment tool Bowtie2 (version 2.2.3) separately (20, 21). Sequence duplicates were removed, and single CpG methylation called using Bismark, then CpG calls from the two ends of reads were merged with inconstant CpG calls of the two ends discarded. Single CpGs with at least 5 reads were considered for the methylation analysis in SI Appendix, Fig. S11b. Bisulfite conversion rate of the ENCODE experiment was estimated to be over 99%.

**Identifying mutation signatures.** We pooled mutations from the following groups of cells: cord blood, SHM- B cells of the 27-30yr old, SHM- B cells of the 52-75yr old, SHM- B cells of the 97-106yr old, SHM+ B cells of the 27-30yr old, SHM+ B cells of the 52-75yr old, SHM+ B cells of the 97-106yr old, and the 6 fibroblasts analyzed previously (6). Using NMF decomposition in the R package “SomaticSignatures” (22), we identified 4 signatures from the above 8 groups. Thirty cancer mutation signatures from COSMIC were downloaded from <http://cancer.sanger.ac.uk/cosmic/signatures> and we calculated the Spearman’s correlation coefficients  $\rho$  between COSMIC signatures and ours using R.

**RNA sequencing.** We performed RNA sequencing on frozen B lymphocytes from two donors (F1 and M2; SI Appendix, Table S1), in duplicate. For each donor, the two replicates were from two blood draws on separate days. Total RNA of B lymphocytes was extracted using RNeasy Micro Kit (Qiagen) according to the manufacturer’s specification. The concentrations of RNA were quantified with Qubit RNA HS Assay Kit (Invitrogen Life Science) and the qualities of RNA were evaluated using bioanalyzer with Agilent RNA 6000 Pico Kit (Agilent Technologies). The RIN number of each sample submitted for sequencing was about 9.0. Libraries were prepared from 500 ng RNA using KAPA Stranded RNA-Seq Kit with RiboErase (KK8483, KAPA Biosystems) with Truseq Index (Illumina) by the Einstein Epigenomics Core. Briefly, rRNA was depleted by hybridization with complementary DNA oligonucleotides, treated with RNase H and DNase to remove rRNA duplexed to DNA and the DNA oligonucleotides. RNA was fragmented using heat and magnesium. Subsequently, 1<sup>st</sup> strand and 2<sup>nd</sup> strand were synthesized to generate double-stranded cDNA (dscDNA). A-tailing was added to 3’-ends of the dscDNA and ligated with adapters. The ligated library was amplified by PCR. The libraries of the four RNA samples were sequenced on the Illumina HiSeq 2500, with 2×100 bp paired-end reads.

After quality check using FastQC (version 0.11.4), raw sequence reads for each sample were aligned to human reference genome (GRCh37.73) using STAR (version 2.5.2b; options: --outSAMattrIHstart 0 --outFilterIntronMotifs RemoveNoncanonical --alignIntronMin 20 --alignIntronMax 1000000 --outFilterMultimapNmax 1 --outSAMtype BAM SortedByCoordinate)(23), and sequence duplications were filtered out using Picard tools (version

1.119). FPKM values of gene expression were calculated using cufflinks (version 2.2.1) with gene annotation from ENSEMBL database (GRCh37.73)(24). Finally, genes with FPKM consistently larger than 1 in all four samples are considered as transcribed, and the other genes untranscribed.

**ATAC sequencing.** ATAC sequencing was performed on fresh B lymphocytes from F1 and M2 donors. Libraries were prepared as described (25). Briefly, to isolate nuclei, we spun 25,000 B cells and washed once with cold PBS. Cells were lysed using 10 mM Tris-HCl, pH 7.4, 10 mM NaCl, 3 mM MgCl<sub>2</sub>, 0.1% IGEPAL CA-630 (26). The nuclei pellet was re-suspended in transposase reaction mix, including 25 µl of 2xTD buffer and 2 µl of Tn5 transposase (Nextera DNA Library Prep Kit, Illumina) and incubated for 30 min at 37°C. After transposition, the fragmented sample was purified using the MinElute PCR Purification Kit (Qiagen) and subsequently PCR-amplified, (10 µl of transposed DNA, 5 µl of nuclease-free water, 5 µl of primer N70#, 5 µl of primer N50#, 25 µl of NEB High Fidelity 2 x PCR Master Mix). PCR conditions were 72 °C for 5 min; 98 °C for 30 s; and five cycles 98 °C for 10 s, 63 °C for 30 s and 72 °C for 1 min. To reduce GC and size bias in PCR, the PCR reaction was monitored using qPCR with 4 µl of the PCR-amplified library, 1 µl of PPC (Nextera DNA Library Prep Kit, Illumina) and 5 µl of 2xSyBr Green Master (Applied Biosystems). The library was amplified for a total of 18 cycles. The libraries were purified using QIAquick PCR Purification Kit (Qiagen) and quantified using Qubit High Sensitivity dsDNA Kit (Invitrogen Life Science). Library quality was assessed using the Agilent Bioanalyzer High-Sensitivity DNA kit (Agilent Technologies). Libraries were sequenced on the Illumina HiSeq 2500, with 2x100 bp reads by the Einstein Epigenomics Core.

The raw reads of ATAC sequencing were adapter- and quality-trimmed using Trim Galore (version 0.3.7). Reads before and after trimming were subjected to quality checking using FastQC (version 0.11.4). Alignment to human reference genome (GRCh37.73) was performed using bowtie2 (version 2.2.3; option: -X 2000). Duplications were removed using Picard tools (version 1.119). Reads with low mapping quality (MapQ<30) were discarded. Open chromatin regions as ATAC sequencing peaks were called using MACS2 (version 2.1.1; option: callpeak -g hs --nomodel --shift -100 --extsize 200) (27).

Mapabilities of all the peaks were estimated using Mapability score obtained from the USCS genome browser and >95% of peaks of both samples were in regions with highest mapability (Mapability score=100%). We used bedtools to determine if reads overlap with the peaks (requiring >= 1 bp overlap), and then checked if the peaks overlap with known TF binding regions reported in ENCODE (requiring 50% bp of peaks overlap with TF binding region; SI Appendix, Table S5). To check the consistency between our ATAC sequencing and RNA sequencing results, we compared enrichment of ATAC seq peaks at TSS of transcribed and untranscribed genes (FPKM>=1 and FPKM<1 respectively, SI Appendix, Fig. S15b). The peak enrichment at TSS was calculated using HOMER (<http://homer.ucsd.edu/homer/>).

Finally, we merged the open chromatin peaks called from sample F1 and M2 using bedtools (version 2.25.0) (28) to annotate somatic mutations.

## References

1. Li H & Durbin R (2009) Fast and accurate short read alignment with Burrows-Wheeler transform. *Bioinformatics (Oxford, England)* 25(14):1754-1760.
2. Li H, *et al.* (2009) The Sequence Alignment/Map format and SAMtools. *Bioinformatics (Oxford, England)* 25(16):2078-2079.
3. Genomes Project C, *et al.* (2012) An integrated map of genetic variation from 1,092 human genomes. *Nature* 491(7422):56-65.
4. McKenna A, *et al.* (2010) The Genome Analysis Toolkit: a MapReduce framework for analyzing next-generation DNA sequencing data. *Genome research* 20(9):1297-1303.

5. Huang L, Ma F, Chapman A, Lu S, & Xie XS (2015) Single-Cell Whole-Genome Amplification and Sequencing: Methodology and Applications. *Annual review of genomics and human genetics* 16:79-102.
6. Dong X, *et al.* (2017) Accurate identification of single-nucleotide variants in whole-genome-amplified single cells. *Nature methods* 14(5):491-493.
7. Wang K, Li M, & Hakonarson H (2010) ANNOVAR: functional annotation of genetic variants from high-throughput sequencing data. *Nucleic acids research* 38(16):e164.
8. Jaiswal S, *et al.* (2017) Clonal Hematopoiesis and Risk of Atherosclerotic Cardiovascular Disease. *The New England journal of medicine* 377(2):111-121.
9. Wang J, *et al.* (2007) Evidence for mutation showers. *Proceedings of the National Academy of Sciences of the United States of America* 104(20):8403-8408.
10. Nik-Zainal S, *et al.* (2012) Mutational processes molding the genomes of 21 breast cancers. *Cell* 149(5):979-993.
11. Lora D (2016) ClusteredMutations: Location and Visualization of Clustered Somatic Mutations. *R package*.
12. Duke JL, *et al.* (2013) Multiple transcription factor binding sites predict AID targeting in non-Ig genes. *Journal of immunology (Baltimore, Md. : 1950)* 190(8):3878-3888.
13. Lohr JG, *et al.* (2012) Discovery and prioritization of somatic mutations in diffuse large B-cell lymphoma (DLBCL) by whole-exome sequencing. *Proceedings of the National Academy of Sciences of the United States of America* 109(10):3879-3884.
14. Okosun J, *et al.* (2014) Integrated genomic analysis identifies recurrent mutations and evolution patterns driving the initiation and progression of follicular lymphoma. *Nature genetics* 46(2):176-181.
15. Stavnezer J, Guikema JE, & Schrader CE (2008) Mechanism and regulation of class switch recombination. *Annual review of immunology* 26:261-292.
16. Benaglia T, Chauveau D, Hunter DR, & Young DS (2009) mixtools: An R Package for Analyzing Finite Mixture Models. *J Stat Softw* 32(6):1-29.
17. Fryxell KJ & Moon WJ (2005) CpG mutation rates in the human genome are highly dependent on local GC content. *Molecular biology and evolution* 22(3):650-658.
18. Rahbari R, *et al.* (2016) Timing, rates and spectra of human germline mutation. *Nat Genet* 48(2):126-133.
19. Alexandrov LB & Stratton MR (2014) Mutational signatures: the patterns of somatic mutations hidden in cancer genomes. *Curr Opin Genet Dev* 24:52-60.
20. Langmead B & Salzberg SL (2012) Fast gapped-read alignment with Bowtie 2. *Nature methods* 9(4):357-359.
21. Krueger F & Andrews SR (2011) Bismark: a flexible aligner and methylation caller for Bisulfite-Seq applications. *Bioinformatics (Oxford, England)* 27(11):1571-1572.
22. Gehring JS, Fischer B, Lawrence M, & Huber W (2015) SomaticSignatures: inferring mutational signatures from single-nucleotide variants. *Bioinformatics (Oxford, England)* 31(22):3673-3675.

23. Dobin A, *et al.* (2013) STAR: ultrafast universal RNA-seq aligner. *Bioinformatics (Oxford, England)* 29(1):15-21.
24. Trapnell C, *et al.* (2012) Differential gene and transcript expression analysis of RNA-seq experiments with TopHat and Cufflinks. *Nature protocols* 7(3):562-578.
25. Buenrostro JD, Giresi PG, Zaba LC, Chang HY, & Greenleaf WJ (2013) Transposition of native chromatin for fast and sensitive epigenomic profiling of open chromatin, DNA-binding proteins and nucleosome position. *Nature methods* 10(12):1213-1218.
26. Buenrostro JD, Wu B, Chang HY, & Greenleaf WJ (2015) ATAC-seq: A Method for Assaying Chromatin Accessibility Genome-Wide. *Current protocols in molecular biology* 109:21 29 21-29.
27. Feng J, Liu T, Qin B, Zhang Y, & Liu XS (2012) Identifying ChIP-seq enrichment using MACS. *Nature protocols* 7(9):1728-1740.
28. Quinlan AR & Hall IM (2010) BEDTools: a flexible suite of utilities for comparing genomic features. *Bioinformatics (Oxford, England)* 26(6):841-842.

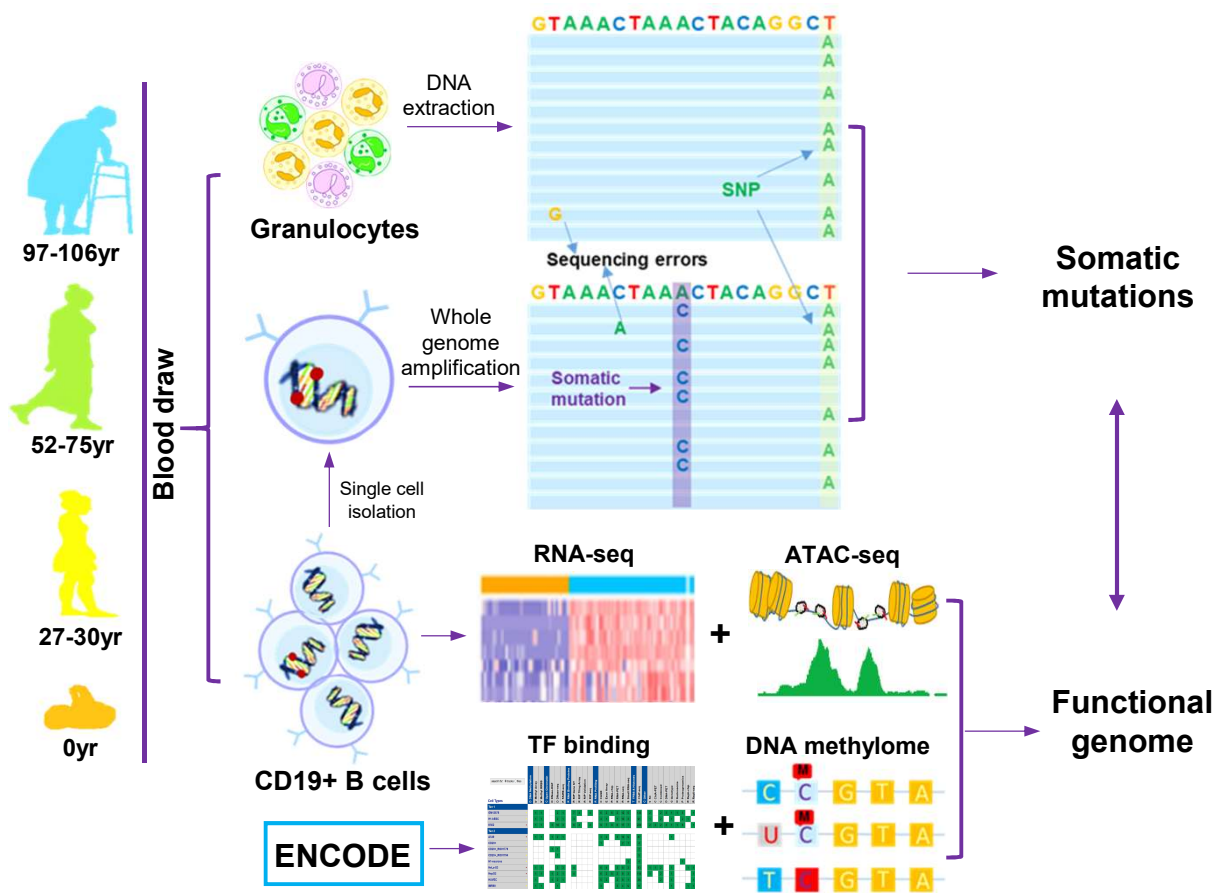

**Fig. S1. Study design.** A schematic illustration of the single-cell approach to characterize the somatic mutational landscape as a function of age in human B lymphocytes.



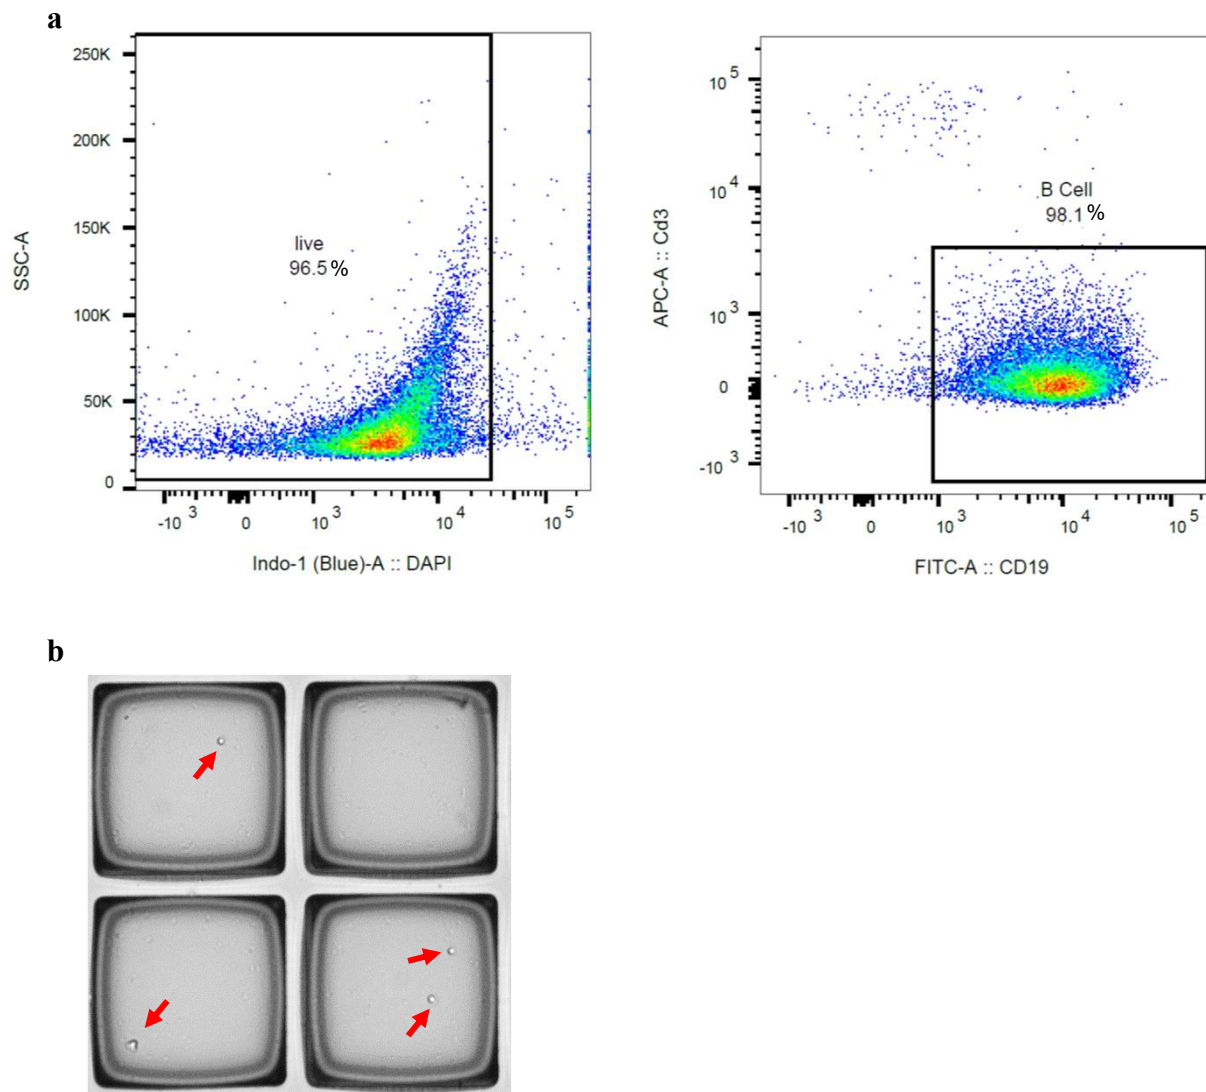

**Fig. S2. Isolating single B lymphocytes. a.** Specificity of B cells isolated using MACS was validated using FACS with DAPI staining for viability checking as well as APC CD3 and FITC CD19 staining for B cell checking. **b.** Isolating single B cells using CellRaft. The red arrows indicate single cells.

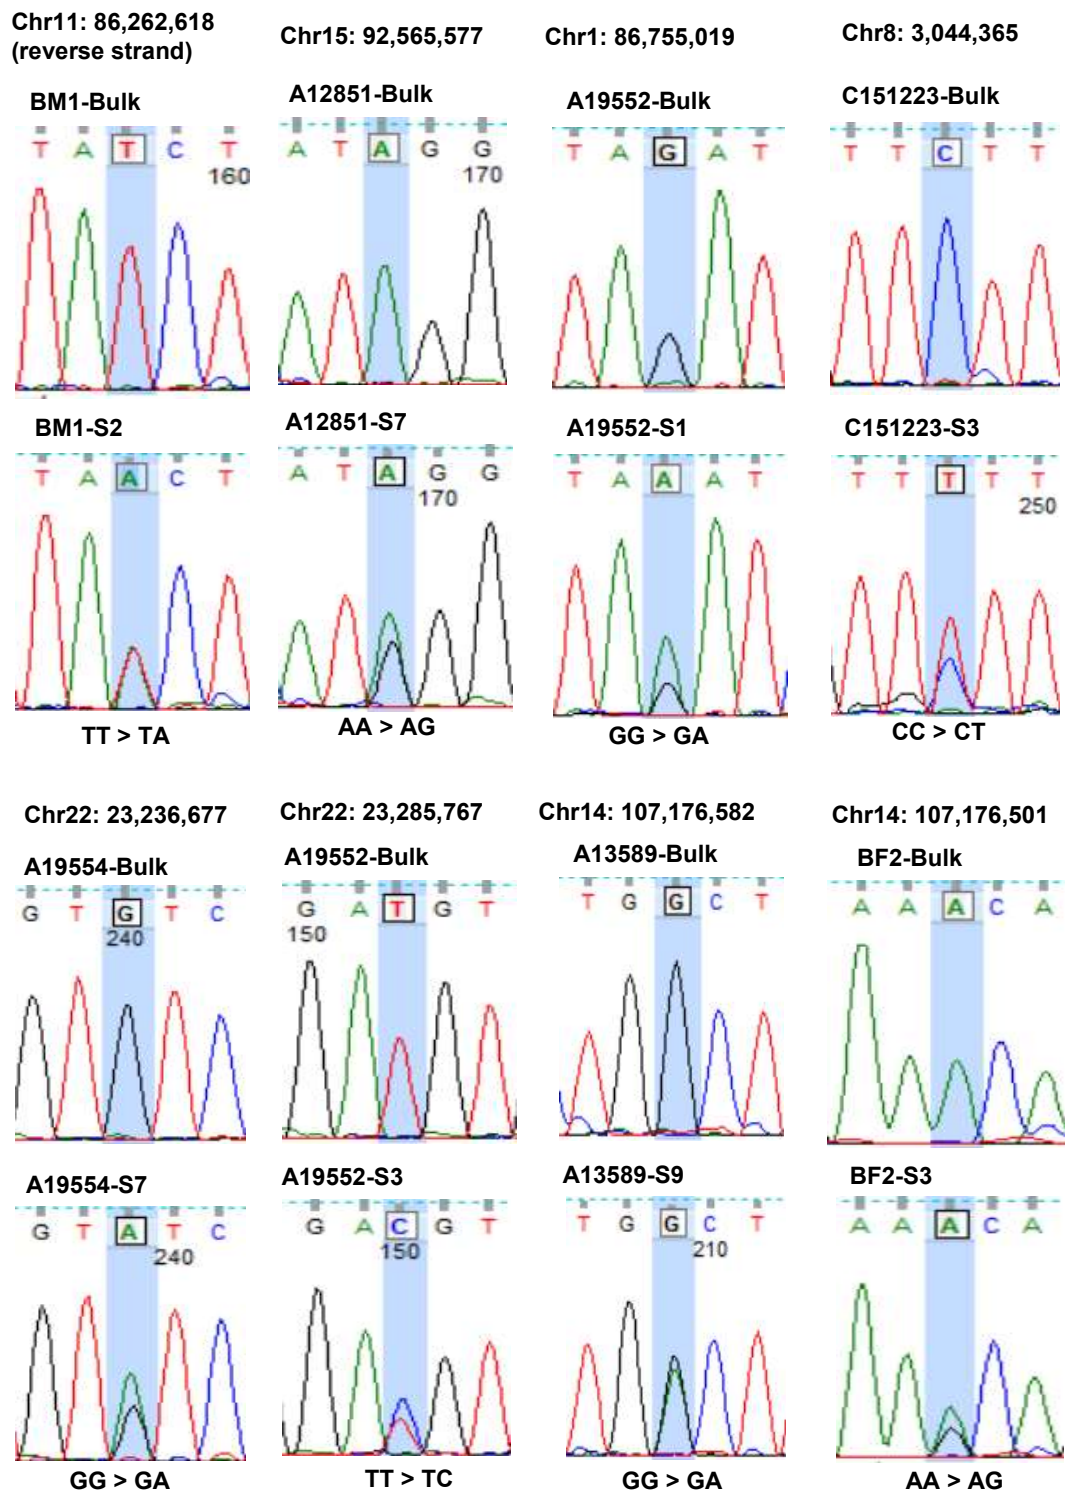

**Fig. S3. Sanger sequencing of randomly selected SNVs.** The genome coordinates of mutations are provided at the top, followed by results of bulk, and results of the single cell.

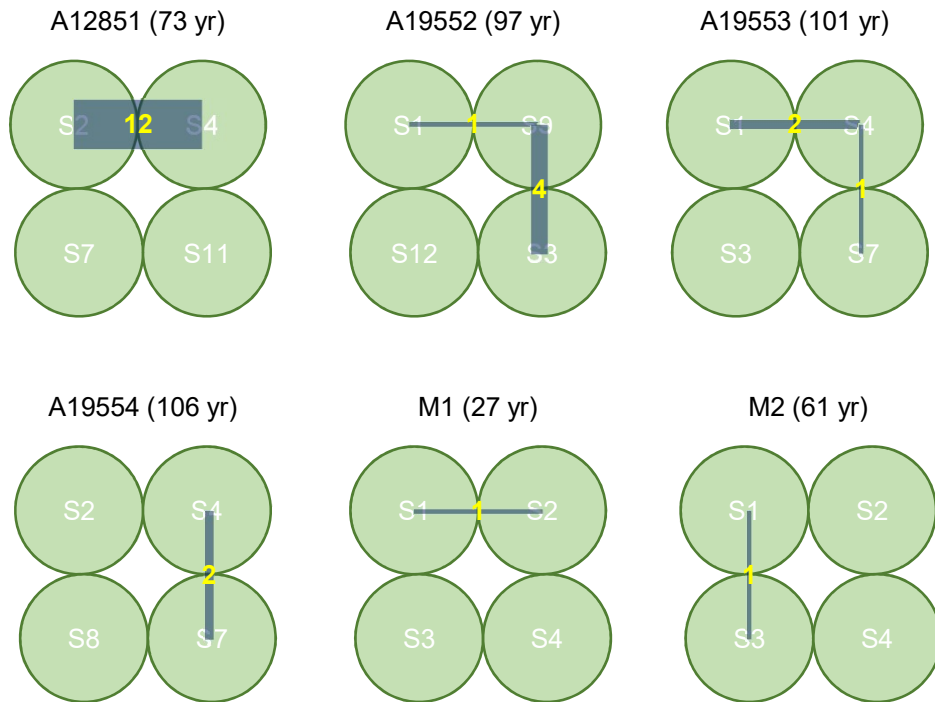

**Fig. S4. Recurrent mutations.** A circle presents a single cell. A line between two cells with a number indicates the number of recurrent mutations found in the two cells.

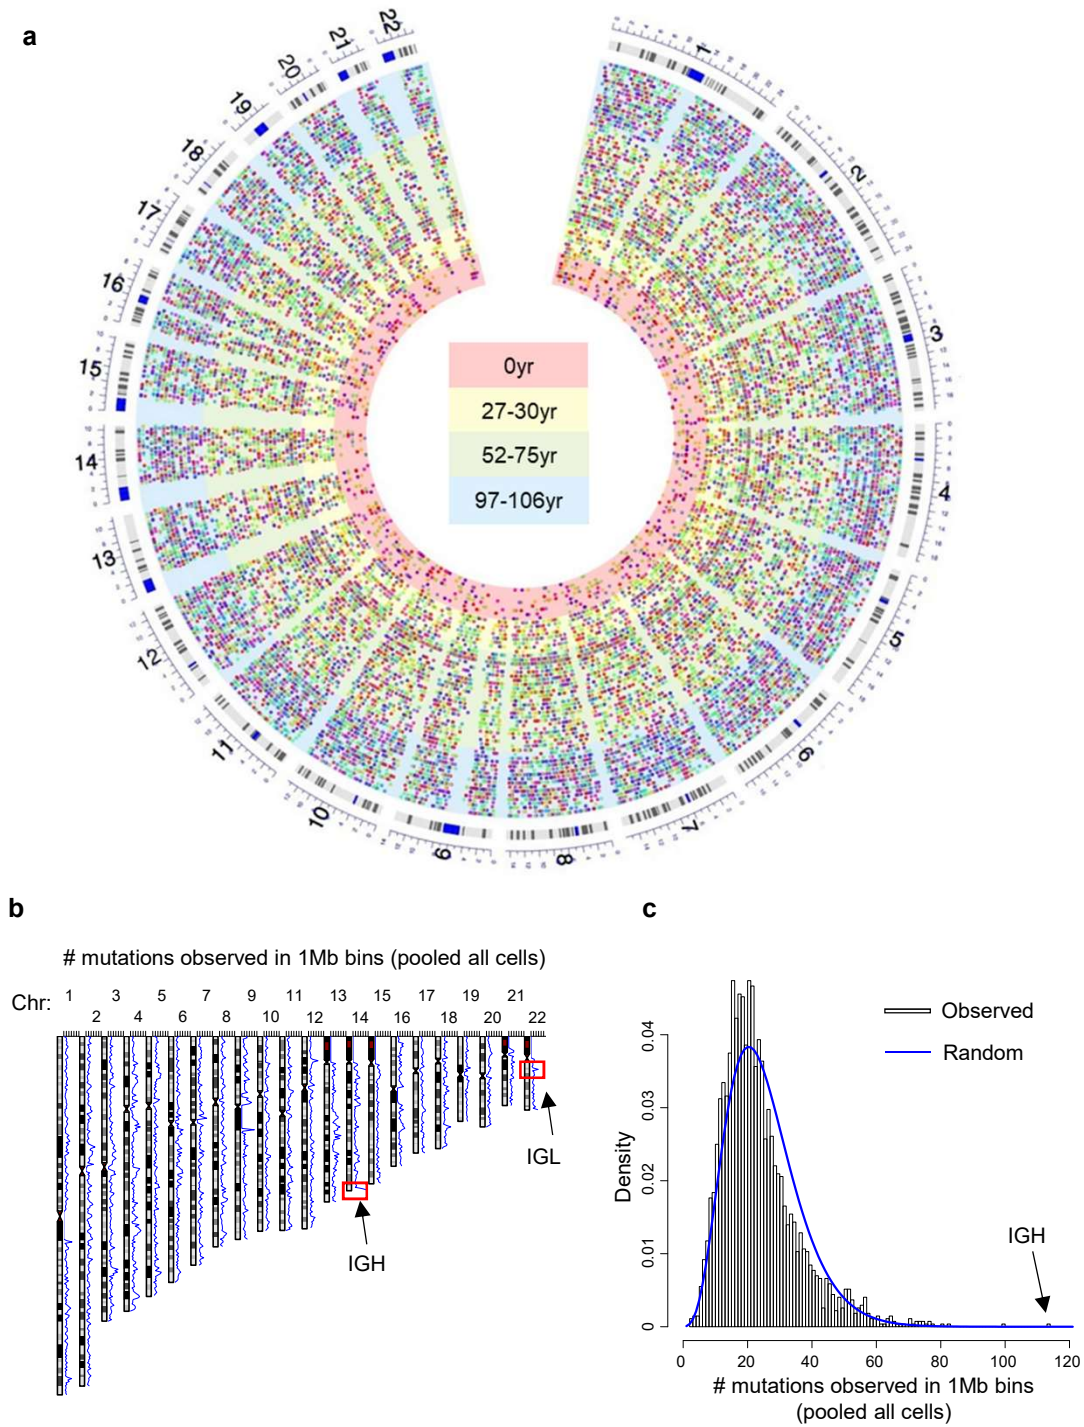

**Fig. S5. Distribution of somatic mutations at Mb scale.** **a.** Circos diagram illustrates genome-wide distribution of SNVs. Each circle represents one cell. Dots present SNVs. Neighboring SNVs are plotted with different colors. Panels correspond to age groups of donors. **b.** Number of mutations (the blue lines) observed in Mb bins across the genome. Mutations from all 56 B cells were pooled in this analysis. **c.** Distribution of the numbers of mutation per Mb bin. The blue line represents the expected negative binomial distribution, which describes random distribution.

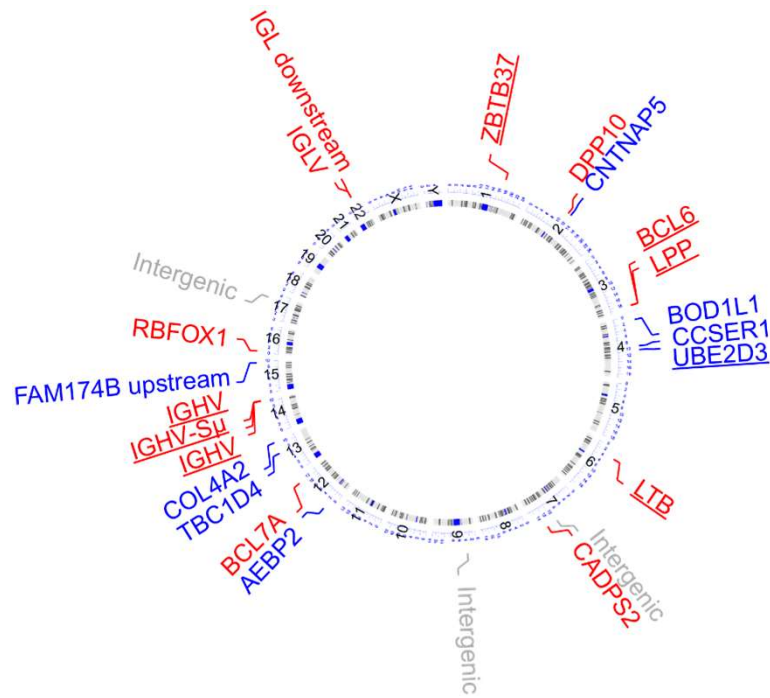

**Fig. S6. Distribution of mutation hotspots across the genome.**

Hotspot names in red and blue indicate the hotspots that previously reported in human studies and those that have been reported separately (Table S4 for details). Hotspot names underlined indicates the hotspots that were discovered in mouse an AID ChIP-sequencing study (see Fig. S8).

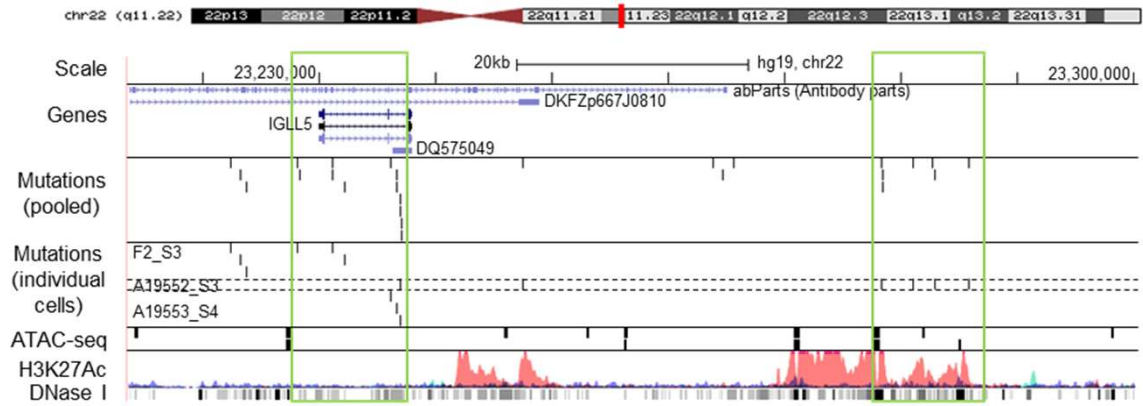

**Fig. S7. Mutation hotspots in IGL regions visualized using the UCSC genome browser.** The legend is the same as Fig. 1c.

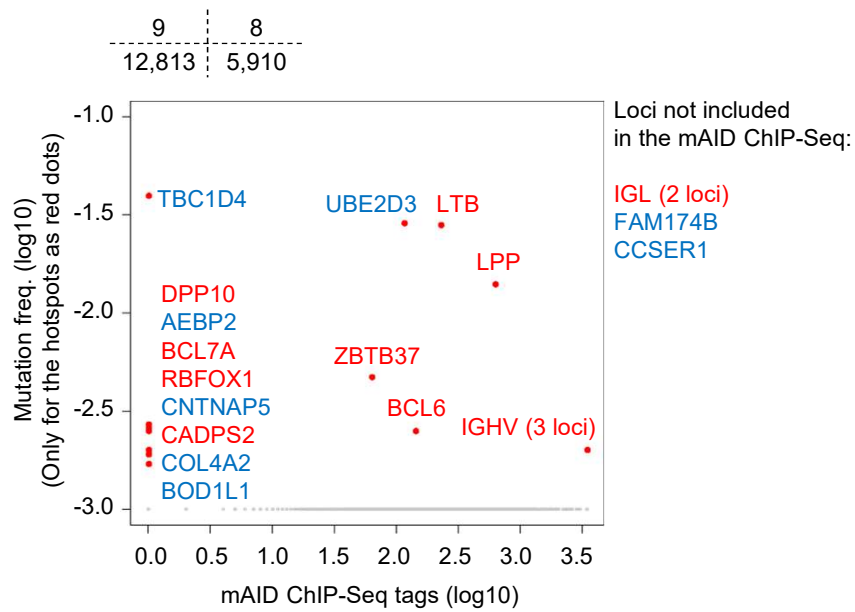

**Fig. S8. Comparing the hotspots with mAID ChIP-sequencing data.** The red dots indicate hotspots identified in this study. The blue dots indicates all the other genes with the mouse AID ChIP-sequencing data. The red and blue color code of hotspot name is the same as Fig. S6.

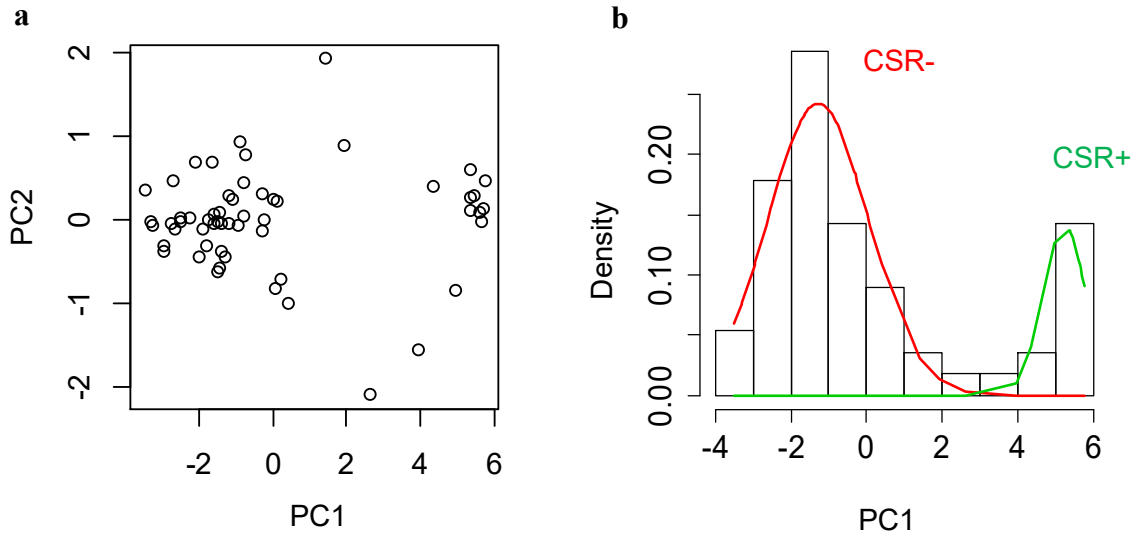

**c**

| SHM+ cells     | CSR+ cells                            |
|----------------|---------------------------------------|
| <b>Cell ID</b> | <b>Prob. of CSR-    Prob. of CSR+</b> |
| C151223_S1     | 1.00E+00    1.21E-26                  |
| C151223_S2     | 1.00E+00    2.63E-30                  |
| C151223_S3     | 1.00E+00    1.90E-19                  |
| C151223_S4     | 9.99E-01    6.33E-04                  |
| C70007_S1      | 1.00E+00    2.90E-17                  |
| C70007_S10     | 1.00E+00    2.38E-33                  |
| C70007_S3      | 1.00E+00    1.28E-34                  |
| C70007_S5      | 1.00E+00    5.52E-36                  |
| BM1_S1         | 4.50E-06    1.00E+00                  |
| BM1_S2         | 1.00E+00    1.60E-07                  |
| BM1_S3         | 1.00E+00    1.33E-29                  |
| BM1_S4         | 1.00E+00    1.57E-43                  |
| BF1_S1         | 2.89E-06    1.00E+00                  |
| BF1_S2         | 1.00E+00    2.85E-38                  |
| BF1_S3         | 1.00E+00    7.88E-28                  |
| BF1_S4         | 1.00E+00    4.33E-34                  |
| BF2_S1         | 1.00E+00    2.00E-32                  |
| BF2_S2         | 1.00E+00    2.34E-34                  |
| BF2_S3         | 5.79E-06    1.00E+00                  |
| BF2_S4         | 1.00E+00    2.87E-46                  |
| BM2_S1         | 1.00E+00    5.57E-52                  |
| BM2_S2         | 1.00E+00    5.85E-33                  |
| BM2_S3         | 1.00E+00    1.82E-30                  |
| BM2_S4         | 1.00E+00    1.65E-32                  |
| A19505_S1      | 1.00E+00    5.37E-32                  |
| A19505_S2      | 1.00E+00    3.02E-43                  |
| A19505_S7      | 1.00E+00    1.90E-10                  |
| A19505_S8      | 1.00E+00    2.64E-48                  |
| <b>Cell ID</b> | <b>Prob. of CSR-    Prob. of CSR+</b> |
| A13589_S10     | 1.00E+00    1.60E-45                  |
| A13589_S3      | 1.00E+00    4.30E-48                  |
| A13589_S6      | 1.00E+00    3.70E-52                  |
| A13589_S9      | 1.00E+00    3.29E-39                  |
| A12851_S11     | 1.00E+00    1.59E-32                  |
| A12851_S2      | 1.00E+00    4.26E-22                  |
| A12851_S4      | 1.00E+00    2.68E-31                  |
| A12851_S7      | 9.84E-03    9.90E-01                  |
| A11365_S1      | 1.00E+00    1.41E-22                  |
| A11365_S2      | 1.00E+00    3.90E-28                  |
| A11365_S3      | 1.00E+00    6.41E-37                  |
| A11365_S4      | 1.00E+00    2.10E-35                  |
| A19552_S1      | 1.00E+00    2.21E-26                  |
| A19552_S12     | 1.00E+00    1.85E-18                  |
| A19552_S3      | 1.91E-06    1.00E+00                  |
| A19552_S9      | 1.00E+00    1.16E-22                  |
| A20061_S14     | 1.00E+00    5.93E-41                  |
| A20061_S16     | 2.50E-06    1.00E+00                  |
| A20061_S2      | 1.00E+00    1.93E-54                  |
| A20061_S9      | 1.00E+00    7.79E-45                  |
| A19553_S1      | 1.00E+00    8.45E-27                  |
| A19553_S3      | 2.66E-05    1.00E+00                  |
| A19553_S4      | 5.66E-06    1.00E+00                  |
| A19553_S7      | 2.18E-06    1.00E+00                  |
| A19554_S2      | 6.80E-04    9.99E-01                  |
| A19554_S4      | 1.00E+00    9.14E-20                  |
| A19554_S7      | 5.43E-06    1.00E+00                  |
| A19554_S8      | 1.00E+00    3.58E-20                  |

**Fig. S9. Identifying CSR from single cells. a.** PCA of normalized depths of IGHM and IGHD loci. **b.** Distribution and modeling of PC1 of the PCA. It virtually separates CSR+/- cells. **c.** Posterior probability of being CSR+/- cells.



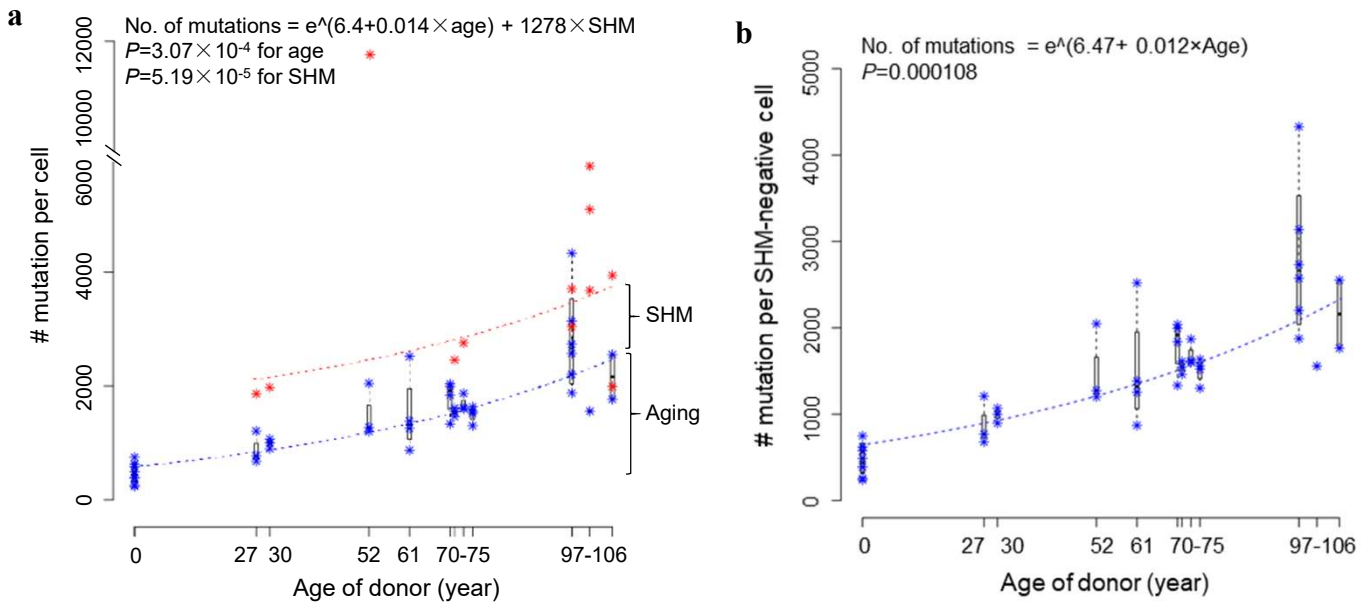

**Fig. S10. Mutation frequencies of SHM+/- B cells. a.** Mutation frequency with age. SHM+ (red asterisks) or SHM- (blue asterisks) cells are considered separately. Regression analyses were performed on the median mutation frequency of all cells of donors. The cell with the highest mutation frequency (from the 52-year old) was not included in the regression analysis (see supplementary text for more discussions about the “outlier” cell). **b.** Somatic SNV frequency in SHM- cells. Both regressions in **a** and **b** were performed using R with the function “nls”.

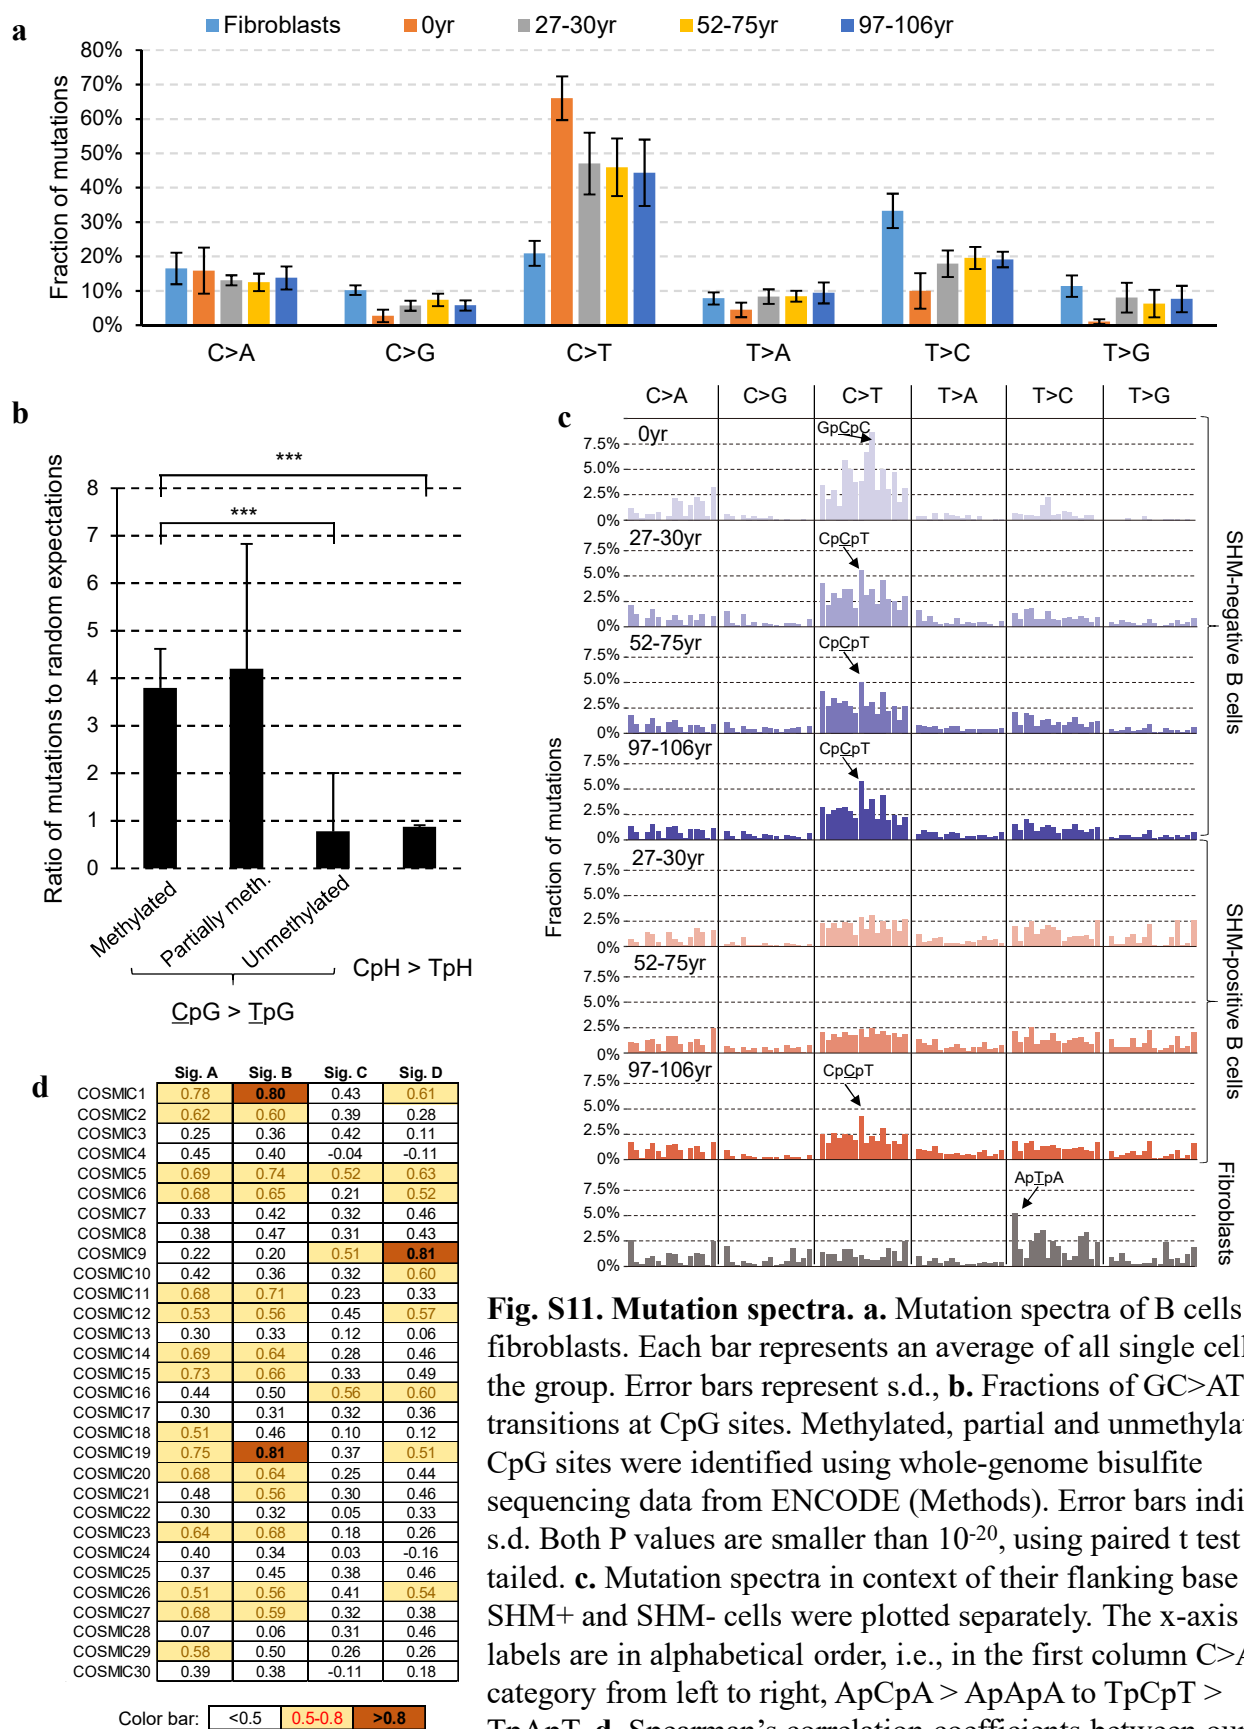

**Fig. S11. Mutation spectra.** **a.** Mutation spectra of B cells and fibroblasts. Each bar represents an average of all single cells of the group. Error bars represent s.d., **b.** Fractions of GC>AT transitions at CpG sites. Methylated, partial and unmethylated CpG sites were identified using whole-genome bisulfite sequencing data from ENCODE (Methods). Error bars indicate s.d. Both P values are smaller than  $10^{-20}$ , using paired t test two tailed. **c.** Mutation spectra in context of their flanking base pairs. SHM+ and SHM- cells were plotted separately. The x-axis labels are in alphabetical order, i.e., in the first column C>A category from left to right, ApCpA > ApApA to TpCpT > TpApT. **d.** Spearman's correlation coefficients between our signatures A to D and COSMIC1 to 30.

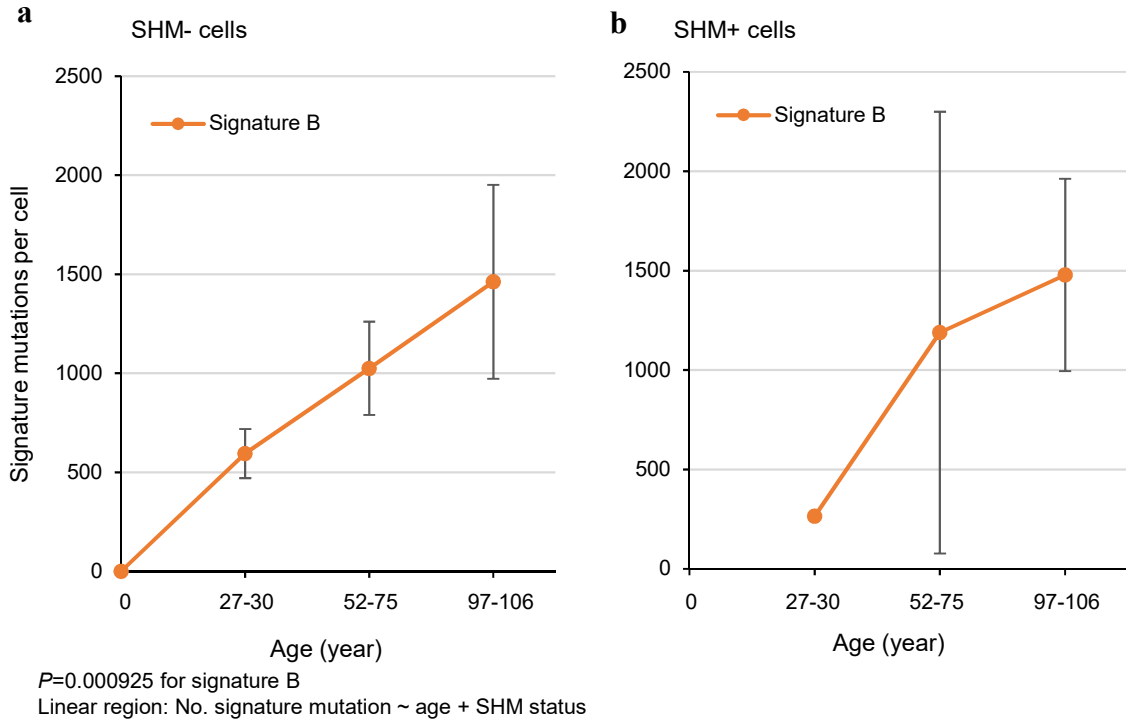

**Fig. S12. Numbers of signature mutations during aging. a. SHM- cells. b. SHM+ cells.**

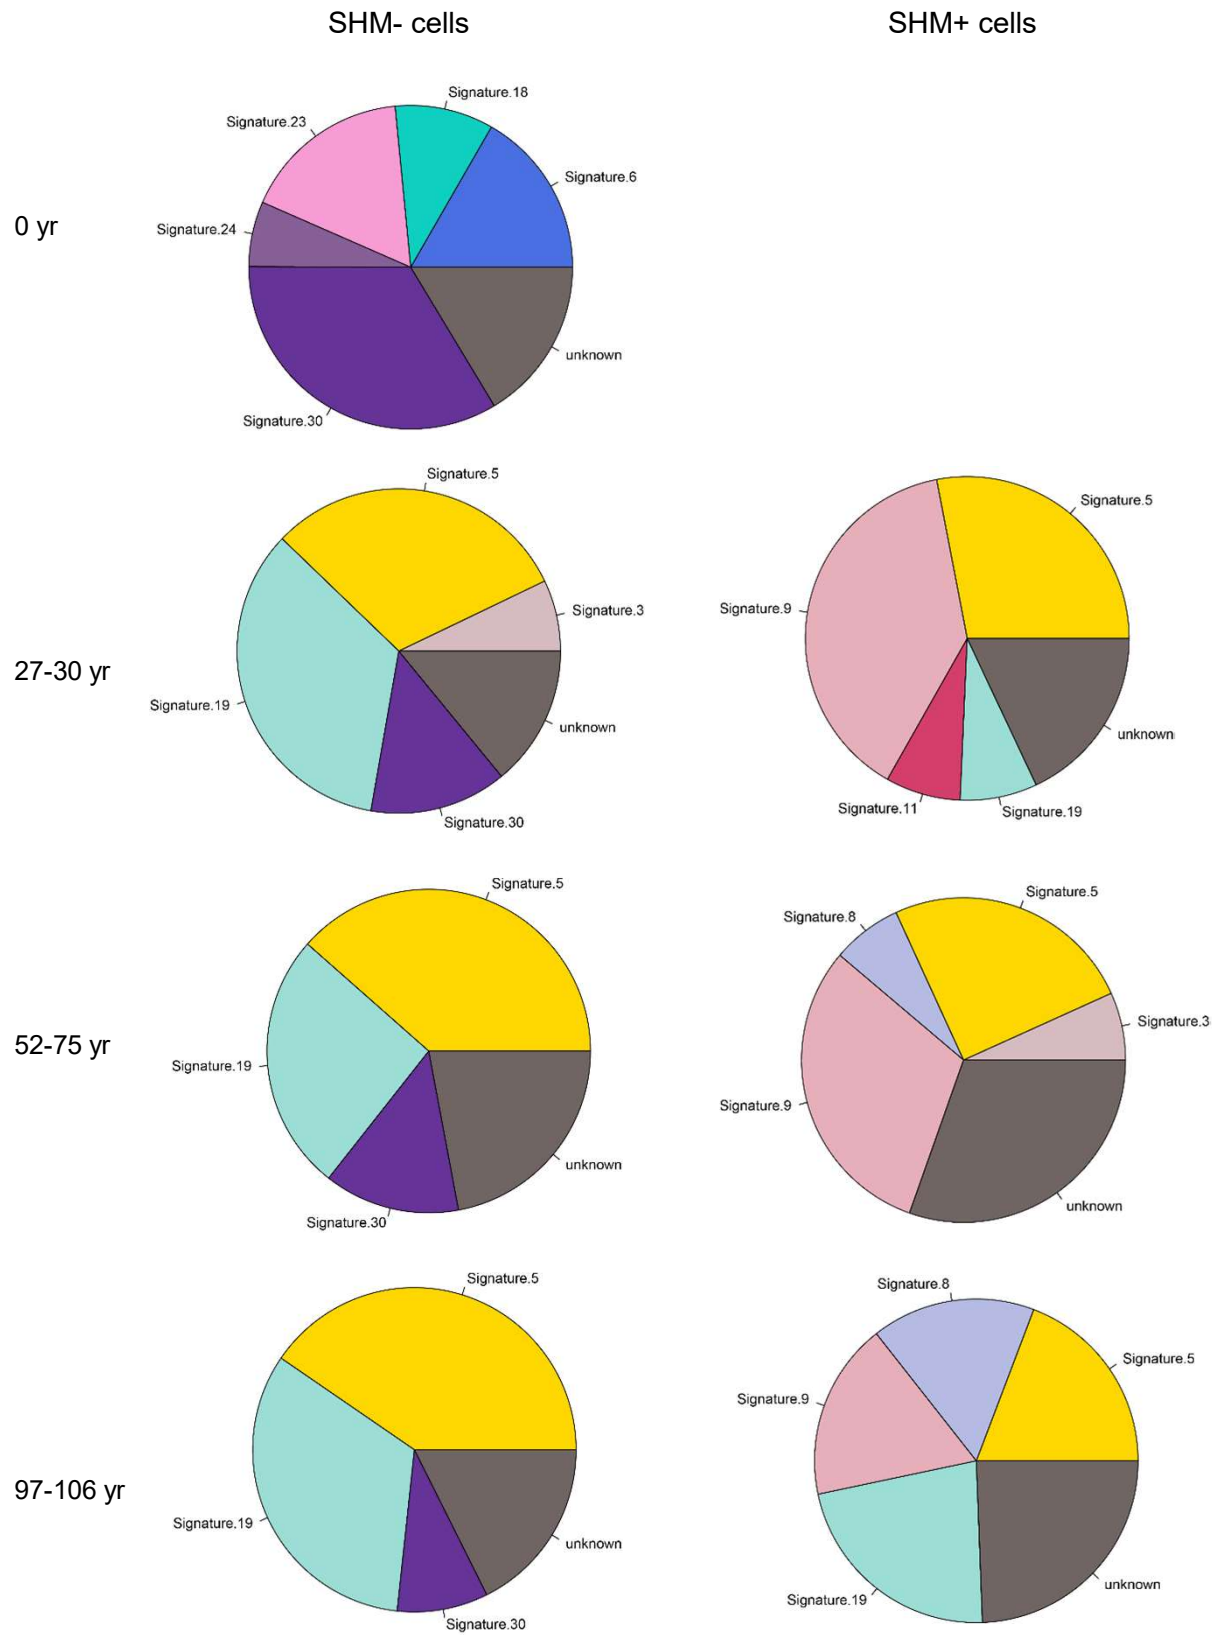

**Fig. S13. Mutation signatures by refitting to the 30 COSMIC signatures.**

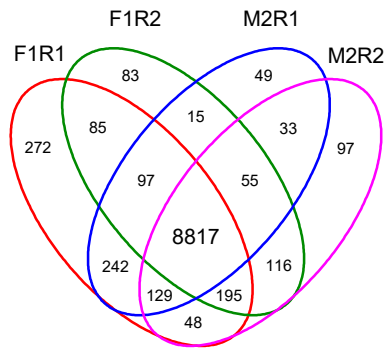

**Fig. S14. Replications of RNA sequencing.** A Venn diagram shows the overlap of transcribed genes between four RNA sequencing replicates.

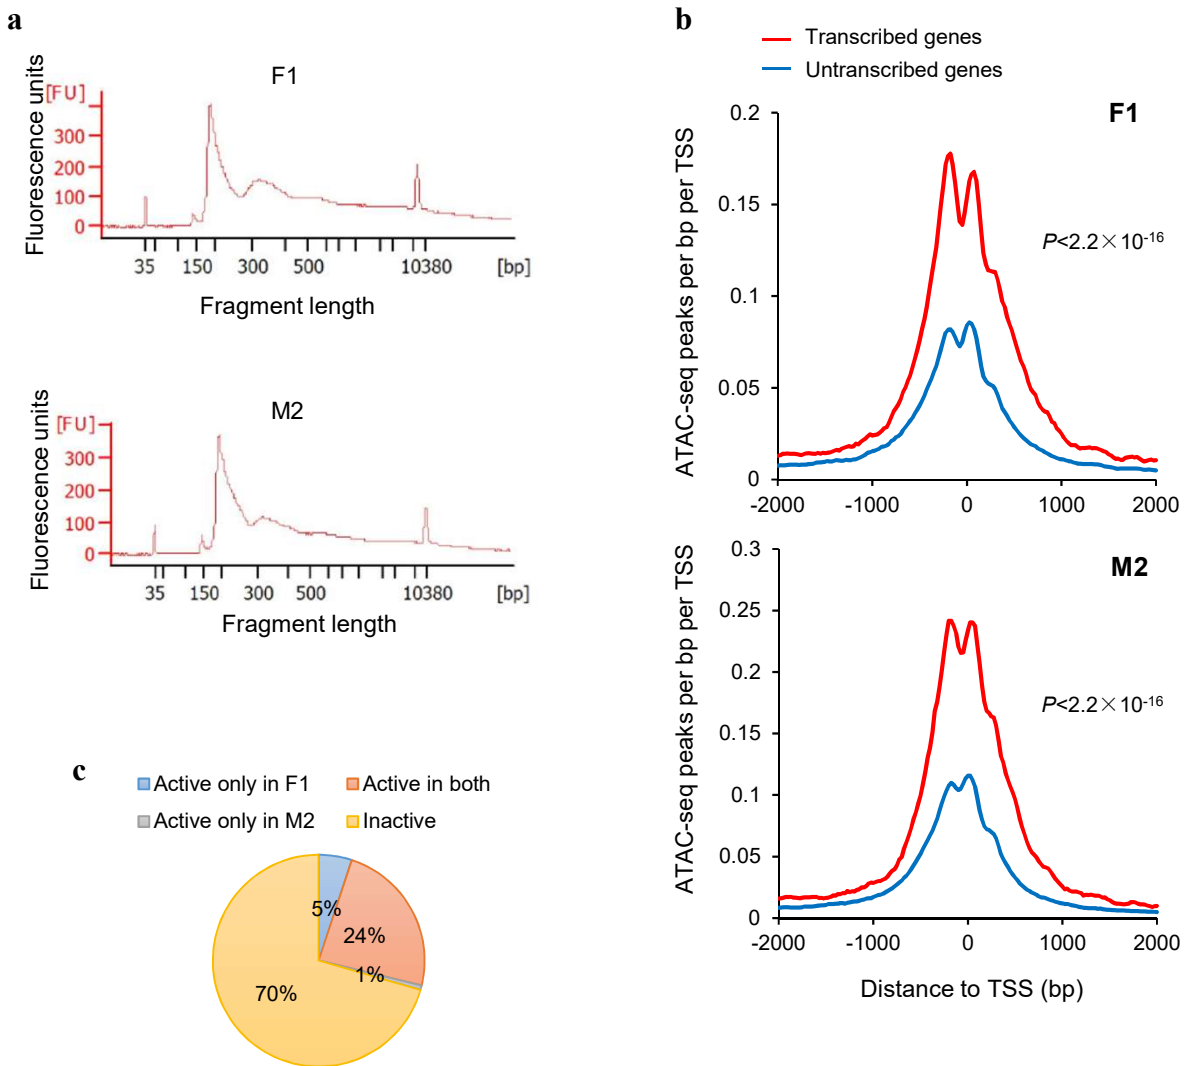

**Fig. S15. ATAC sequencing.** **a.** Bioanalyzer of ATAC sequencing library. **b.** ATAC sequencing peaks are significantly enriched in active genes than inactive genes in both of our ATAC sequencing samples (both  $P < 2.2 \times 10^{-16}$ , Wilcoxon signed-rank test, one tailed). **c.** Fraction of active TF binding regions identified using ATAC sequencing from two replicates, F1 and M2. The total TF binding regions were identified by the ENCODE from multiple cell types.

**Table S1. A summary of donor information and whole-genome sequencing statistics.**

| Sample        | Donor   | Type          | Age (yr) | Gender | # raw read pairs<br>(150bp paired) | Average depth<br>(MapQ>40) | % Genome (covered with reads of MapQ≥40) |       |       |       |
|---------------|---------|---------------|----------|--------|------------------------------------|----------------------------|------------------------------------------|-------|-------|-------|
|               |         |               |          |        |                                    |                            | ≥ 20x                                    | ≥ 10x | ≥ 5x  | at 0x |
| CB151223_gDNA | C151223 | Bulk          | 0        | Female | 447,118,378                        | 29.9                       | 87.3%                                    | 89.3% | 89.7% | 9.9%  |
| C151223_S1    | C151223 | Single B cell | 0        | Female | 388,942,268                        | 27.1                       | 53.9%                                    | 77.3% | 86.0% | 10.4% |
| C151223_S2    | C151223 | Single B cell | 0        | Female | 400,781,323                        | 27.0                       | 48.3%                                    | 70.2% | 81.7% | 11.0% |
| C151223_S3    | C151223 | Single B cell | 0        | Female | 395,046,402                        | 26.3                       | 48.5%                                    | 72.8% | 83.9% | 10.7% |
| C151223_S4    | C151223 | Single B cell | 0        | Female | 452,383,430                        | 30.6                       | 54.2%                                    | 75.7% | 84.9% | 10.5% |
| CB70007_gDNA  | C70007  | Bulk          | 0        | Female | 369,391,632                        | 25.8                       | 82.3%                                    | 89.2% | 89.6% | 9.9%  |
| C70007_S1     | C70007  | Single B cell | 0        | Female | 446,148,531                        | 29.7                       | 44.8%                                    | 60.2% | 70.5% | 17.3% |
| C70007_S10    | C70007  | Single B cell | 0        | Female | 366,575,784                        | 24.4                       | 41.8%                                    | 63.5% | 76.9% | 12.3% |
| C70007_S3     | C70007  | Single B cell | 0        | Female | 409,284,627                        | 27.8                       | 51.6%                                    | 73.8% | 83.9% | 10.8% |
| C70007_S5     | C70007  | Single B cell | 0        | Female | 360,353,854                        | 24.9                       | 43.4%                                    | 69.6% | 83.1% | 10.7% |
| BM1_gDNA      | M1      | Bulk          | 27       | Male   | 356,028,466                        | 27.7                       | 82.3%                                    | 89.1% | 90.0% | 9.6%  |
| BM1_S1        | M1      | Single B cell | 27       | Male   | 316,496,046                        | 25.5                       | 49.1%                                    | 71.4% | 82.3% | 11.0% |
| BM1_S2        | M1      | Single B cell | 27       | Male   | 306,310,518                        | 25.3                       | 51.3%                                    | 75.5% | 85.2% | 10.3% |
| BM1_S3        | M1      | Single B cell | 27       | Male   | 306,943,395                        | 25.4                       | 49.6%                                    | 72.1% | 82.6% | 11.1% |
| BM1_S4        | M1      | Single B cell | 27       | Male   | 375,482,752                        | 31.0                       | 61.9%                                    | 81.4% | 87.4% | 10.1% |
| BF1_gDNA      | F1      | Bulk          | 30       | Female | 314,798,478                        | 24.2                       | 79.6%                                    | 88.8% | 89.4% | 10.1% |
| BF1_S1        | F1      | Single B cell | 30       | Female | 302,215,091                        | 24.7                       | 48.6%                                    | 71.6% | 82.3% | 11.4% |
| BF1_S2        | F1      | Single B cell | 30       | Female | 350,226,628                        | 28.4                       | 54.3%                                    | 74.9% | 83.9% | 11.0% |
| BF1_S3        | F1      | Single B cell | 30       | Female | 306,804,490                        | 25.2                       | 46.5%                                    | 68.8% | 80.7% | 11.6% |
| BF1_S4        | F1      | Single B cell | 30       | Female | 353,910,036                        | 28.7                       | 51.3%                                    | 71.8% | 82.1% | 11.4% |
| BF2_gDNA      | F2      | Bulk          | 52       | Female | 308,228,315                        | 23.8                       | 78.5%                                    | 88.7% | 89.4% | 10.1% |
| BF2_S1        | F2      | Single B cell | 52       | Female | 417,393,265                        | 33.6                       | 59.2%                                    | 77.3% | 84.8% | 11.0% |
| BF2_S2        | F2      | Single B cell | 52       | Female | 317,430,742                        | 25.6                       | 52.4%                                    | 77.5% | 86.2% | 10.6% |
| BF2_S3        | F2      | Single B cell | 52       | Female | 317,446,881                        | 24.8                       | 48.1%                                    | 71.7% | 82.6% | 11.3% |
| BF2_S4        | F2      | Single B cell | 52       | Female | 327,061,166                        | 25.3                       | 49.2%                                    | 71.7% | 82.1% | 11.5% |
| BM2_gDNA      | M2      | Bulk          | 61       | Male   | 338,247,300                        | 26.3                       | 80.9%                                    | 89.0% | 90.0% | 9.6%  |
| BM2_S1        | M2      | Single B cell | 61       | Male   | 314,058,864                        | 26.0                       | 49.8%                                    | 71.9% | 82.5% | 11.1% |
| BM2_S2        | M2      | Single B cell | 61       | Male   | 302,780,471                        | 24.9                       | 54.9%                                    | 80.1% | 87.4% | 10.1% |
| BM2_S3        | M2      | Single B cell | 61       | Male   | 332,546,538                        | 27.3                       | 60.8%                                    | 82.1% | 87.7% | 10.1% |
| BM2_S4        | M2      | Single B cell | 61       | Male   | 320,199,875                        | 26.3                       | 51.2%                                    | 72.9% | 83.0% | 11.0% |
| A19505_gDNA   | A19505  | Bulk          | 70       | Female | 306,472,703                        | 22.8                       | 74.0%                                    | 88.9% | 89.5% | 10.0% |
| A19505_S1     | A19505  | Single B cell | 70       | Female | 340,510,527                        | 27.4                       | 52.2%                                    | 73.4% | 83.1% | 11.1% |
| A19505_S2     | A19505  | Single B cell | 70       | Female | 375,306,516                        | 30.1                       | 55.8%                                    | 75.7% | 84.4% | 10.8% |
| A19505_S7     | A19505  | Single B cell | 70       | Female | 364,565,885                        | 29.6                       | 57.7%                                    | 77.1% | 84.9% | 10.8% |
| A19505_S8     | A19505  | Single B cell | 70       | Female | 353,243,881                        | 28.8                       | 43.0%                                    | 57.5% | 67.5% | 19.7% |
| A13589_gDNA   | A13589  | Bulk          | 71       | Male   | 302,722,849                        | 23.6                       | 73.5%                                    | 87.9% | 89.7% | 9.6%  |
| A13589_S10    | A13589  | Single B cell | 71       | Male   | 352,853,899                        | 27.7                       | 51.8%                                    | 74.9% | 84.8% | 10.4% |
| A13589_S3     | A13589  | Single B cell | 71       | Male   | 316,476,183                        | 25.9                       | 45.9%                                    | 67.4% | 78.8% | 12.9% |
| A13589_S6     | A13589  | Single B cell | 71       | Male   | 357,301,294                        | 27.9                       | 48.9%                                    | 69.3% | 80.3% | 11.5% |
| A13589_S9     | A13589  | Single B cell | 71       | Male   | 349,908,666                        | 27.6                       | 49.7%                                    | 72.2% | 83.0% | 10.8% |
| A12851_gDNA   | A12851  | Bulk          | 73       | Female | 302,604,577                        | 23.5                       | 71.4%                                    | 87.8% | 89.2% | 10.1% |
| A12851_S11    | A12851  | Single B cell | 73       | Female | 355,985,717                        | 29.0                       | 55.0%                                    | 77.0% | 85.5% | 10.7% |
| A12851_S2     | A12851  | Single B cell | 73       | Female | 302,247,455                        | 24.7                       | 48.3%                                    | 72.6% | 83.3% | 11.2% |
| A12851_S4     | A12851  | Single B cell | 73       | Female | 300,416,996                        | 24.5                       | 44.8%                                    | 67.8% | 80.1% | 11.8% |
| A12851_S7     | A12851  | Single B cell | 73       | Female | 317,254,981                        | 25.8                       | 48.8%                                    | 73.0% | 83.8% | 10.9% |
| A11365_gDNA   | A11365  | Bulk          | 75       | Male   | 302,455,601                        | 22.1                       | 70.0%                                    | 88.0% | 89.9% | 9.5%  |
| A11365_S1     | A11365  | Single B cell | 75       | Male   | 361,916,064                        | 28.9                       | 56.8%                                    | 77.3% | 85.5% | 10.2% |
| A11365_S2     | A11365  | Single B cell | 75       | Male   | 342,679,387                        | 27.7                       | 52.2%                                    | 73.5% | 83.4% | 10.6% |
| A11365_S3     | A11365  | Single B cell | 75       | Male   | 360,320,205                        | 29.0                       | 55.2%                                    | 75.9% | 84.7% | 10.4% |
| A11365_S4     | A11365  | Single B cell | 75       | Male   | 329,245,422                        | 26.5                       | 49.2%                                    | 71.5% | 82.5% | 10.8% |
| A19552_gDNA   | A19552  | Bulk          | 97       | Female | 308,223,015                        | 24.4                       | 74.3%                                    | 88.1% | 89.2% | 10.1% |
| A19552_S1     | A19552  | Single B cell | 97       | Female | 356,839,719                        | 27.9                       | 48.3%                                    | 71.6% | 83.4% | 10.8% |
| A19552_S12    | A19552  | Single B cell | 97       | Female | 346,435,985                        | 28.3                       | 50.0%                                    | 72.6% | 83.4% | 10.9% |
| A19552_S3     | A19552  | Single B cell | 97       | Female | 403,047,551                        | 31.7                       | 54.2%                                    | 74.0% | 83.3% | 11.2% |
| A19552_S9     | A19552  | Single B cell | 97       | Female | 404,247,709                        | 31.5                       | 55.7%                                    | 77.5% | 86.1% | 10.5% |
| A20061_gDNA   | A20061  | Bulk          | 97       | Female | 371,214,240                        | 28.9                       | 83.4%                                    | 88.6% | 89.4% | 10.1% |
| A20061_S14    | A20061  | Single B cell | 97       | Female | 453,045,813                        | 37.5                       | 53.2%                                    | 70.1% | 80.2% | 11.9% |
| A20061_S16    | A20061  | Single B cell | 97       | Female | 368,446,853                        | 30.6                       | 52.7%                                    | 73.1% | 82.9% | 11.2% |
| A20061_S2     | A20061  | Single B cell | 97       | Female | 307,497,525                        | 25.5                       | 43.8%                                    | 65.9% | 78.9% | 11.8% |
| A20061_S9     | A20061  | Single B cell | 97       | Female | 453,195,484                        | 37.6                       | 63.1%                                    | 80.5% | 86.7% | 10.5% |
| A19553_gDNA   | A19553  | Bulk          | 101      | Female | 316,400,667                        | 24.8                       | 80.4%                                    | 89.0% | 89.5% | 10.0% |
| A19553_S1     | A19553  | Single B cell | 101      | Female | 361,537,188                        | 29.2                       | 55.8%                                    | 75.9% | 84.4% | 10.9% |
| A19553_S3     | A19553  | Single B cell | 101      | Female | 387,102,070                        | 30.8                       | 56.9%                                    | 76.1% | 84.3% | 10.9% |
| A19553_S4     | A19553  | Single B cell | 101      | Female | 371,715,143                        | 29.7                       | 55.5%                                    | 73.4% | 81.6% | 12.1% |
| A19553_S7     | A19553  | Single B cell | 101      | Female | 367,441,847                        | 29.7                       | 53.4%                                    | 72.1% | 81.5% | 11.7% |
| A19554_gDNA   | A19554  | Bulk          | 106      | Female | 340,186,669                        | 26.4                       | 82.5%                                    | 89.0% | 89.5% | 9.9%  |
| A19554_S2     | A19554  | Single B cell | 106      | Female | 349,720,246                        | 28.2                       | 51.4%                                    | 72.4% | 82.5% | 11.2% |
| A19554_S4     | A19554  | Single B cell | 106      | Female | 331,479,239                        | 25.5                       | 48.7%                                    | 70.6% | 81.5% | 11.5% |
| A19554_S7     | A19554  | Single B cell | 106      | Female | 321,763,064                        | 24.9                       | 48.2%                                    | 71.0% | 82.0% | 11.3% |
| A19554_S8     | A19554  | Single B cell | 106      | Female | 314,807,986                        | 24.0                       | 46.1%                                    | 69.2% | 81.1% | 11.5% |

**Table S2. Sanger sequencing validation of randomly selected somatic SNVs.**

| Sample ID                                  | Chr | Position    | Reference | Genotype by Sanger |             | Genotype by Scaller |             | Confirmed in sanger               |
|--------------------------------------------|-----|-------------|-----------|--------------------|-------------|---------------------|-------------|-----------------------------------|
|                                            |     |             |           | Bulk               | Single cell | Bulk                | Single cell |                                   |
| <i>Mutations in non SHM regions (n=20)</i> |     |             |           |                    |             |                     |             |                                   |
| A13589_S3                                  | 8   | 67,218,116  | G         | G/G                | G/A         | G/G                 | G/A         | Yes                               |
| A19553_S3                                  | 9   | 1,849,367   | T         | T/T                | T/G         | T/T                 | T/G         | Yes                               |
| A19553_S4                                  | 7   | 82,146,651  | G         | G/G                | G/A         | G/G                 | G/A         | Yes                               |
| BF1_S2                                     | 18  | 67,884,384  | C         | C/C                | C/T         | C/C                 | C/T         | Yes                               |
| A20061_S9                                  | 5   | 134,576,475 | G         | G/G                | G/A         | G/G                 | G/A         | Yes                               |
| A19552_S1                                  | 1   | 86,755,019  | G         | G/G                | G/A         | G/G                 | G/A         | Yes                               |
| BM1_S2                                     | 11  | 86,262,618  | A         | A/A                | A/T         | A/A                 | A/T         | Yes                               |
| BF1_S2                                     | 14  | 42,197,923  | A         | A/A                | A/C         | A/A                 | A/C         | Yes                               |
| A12851_S7                                  | 15  | 92,565,577  | A         | A/A                | A/G         | A/A                 | A/G         | Yes                               |
| BM1_S2                                     | 5   | 38,503,507  | C         | C/C                | C/A         | C/C                 | C/A         | Yes                               |
| BF2_S3                                     | 5   | 78,278,779  | T         | T/T                | T/G         | T/T                 | T/G         | Yes                               |
| BF2_S3                                     | 7   | 46,787,006  | T         | T/T                | T/C         | T/T                 | T/C         | Yes                               |
| BM2_S3                                     | 7   | 105,704,449 | G         | G/G                | G/T         | G/G                 | G/T         | Yes                               |
| C70007_S10                                 | 19  | 4,354,106   | G         | G/G                | G/A         | G/G                 | G/A         | Yes                               |
| A19554_S8                                  | 2   | 219,754,945 | C         | C/C                | C/T         | C/C                 | C/T         | Yes                               |
| A19552_S9                                  | 5   | 61,977,544  | G         | G/G                | G/A         | G/G                 | G/A         | Yes                               |
| A19552_S12                                 | 6   | 15,887,836  | C         | C/C                | C/T         | C/C                 | C/T         | Yes                               |
| A19505_S7                                  | 5   | 122,114,692 | T         | T/T                | T/A         | T/T                 | T/A         | Yes                               |
| C151223_S2                                 | 12  | 131,419,912 | G         | G/G                | G/T         | G/G                 | G/T         | Yes                               |
| C151223_S3                                 | 8   | 3,044,365   | C         | C/C                | C/T         | C/C                 | C/T         | Yes                               |
| <i>Mutations in SHM regions (n=30)</i>     |     |             |           |                    |             |                     |             |                                   |
| A19552_S3                                  | 22  | 23,285,767  | T         | T/T                | T/C         | T/T                 | T/C         | Yes                               |
| A19554_S8                                  | 22  | 23,278,467  | T         | T/T                | T/C         | T/T                 | T/C         | Yes                               |
| A19554_S8                                  | 22  | 23,278,462  | T         | T/T                | T/C         | T/T                 | T/C         | Yes                               |
| A19552_S3                                  | 22  | 23,281,038  | T         | T/T                | T/A         | T/T                 | T/A         | Yes                               |
| A19552_S3                                  | 22  | 23,278,327  | T         | T/T                | T/C         | T/T                 | T/C         | Yes                               |
| A12851_S7                                  | 22  | 23,237,013  | A         | A/A                | A/C         | A/A                 | A/C         | Yes                               |
| A12851_S7                                  | 22  | 23,237,006  | C         | C/C                | C/T         | C/C                 | C/T         | Yes                               |
| A19552_S3                                  | 22  | 23,236,912  | G         | G/G                | G/C         | G/G                 | G/C         | Yes                               |
| A19553_S4                                  | 22  | 23,236,903  | A         | A/A                | A/G         | A/A                 | A/G         | Yes                               |
| A19554_S7                                  | 22  | 23,236,677  | G         | G/G                | G/A         | G/G                 | G/A         | Yes                               |
| A19553_S4                                  | 22  | 23,236,114  | T         | T/T                | T/A         | T/T                 | T/A         | Yes                               |
| BF2_S3                                     | 22  | 23,231,105  | A         | A/A                | A/G         | A/A                 | A/G         | Yes                               |
| A20061_S9                                  | 22  | 23,231,099  | C         | C/C                | C/T         | C/C                 | C/T         | Yes                               |
| BF2_S3                                     | 14  | 107,179,846 | T         | T/T                | T/C         | T/T                 | T/C         | Yes                               |
| BF2_S3                                     | 14  | 107,179,752 | C         | C/C                | C/A         | C/C                 | C/A         | Yes                               |
| BM1_S1                                     | 14  | 107,179,766 | A         | A/A                | A/G         | A/A                 | A/G         | Yes                               |
| A13589_S9                                  | 14  | 107,176,582 | G         | G/G                | G/A         | G/G                 | G/A         | Yes                               |
| BF2_S3                                     | 14  | 107,176,501 | A         | A/A                | A/G         | A/A                 | A/G         | Yes                               |
| A19553_S3                                  | 14  | 106,329,284 | C         | C/C                | C/T         | C/C                 | C/T         | Yes                               |
| A19553_S3                                  | 14  | 106,329,193 | T         | T/T                | T/C         | T/T                 | T/C         | Yes                               |
| A19552_S3                                  | 14  | 106,327,764 | T         | T/T                | T/A         | T/T                 | T/A         | Yes                               |
| A19553_S3                                  | 14  | 106,327,696 | C         | C/C                | C/A         | C/C                 | C/A         | Yes                               |
| A19554_S7                                  | 14  | 106,327,631 | C         | C/C                | C/T         | C/C                 | C/T         | Yes                               |
| A19553_S7                                  | 14  | 106,114,148 | C         | C/C                | C/T         | C/C                 | C/T         | Yes                               |
| A19553_S7                                  | 14  | 106,112,196 | G         | G/G                | G/A         | G/G                 | G/A         | Yes                               |
| A19553_S7                                  | 14  | 106,112,156 | G         | G/G                | G/A         | G/G                 | G/A         | Yes                               |
| A19554_S7                                  | 14  | 106,112,113 | G         | G/G                | G/A         | G/G                 | G/A         | Yes                               |
| A19554_S7                                  | 14  | 106,112,047 | G         | G/G                | G/A         | G/G                 | G/A         | Yes                               |
| A19552_S3                                  | 14  | 106,326,618 | G         | G/G                | G/G         | G/G                 | G/A         | No (not confirmed in single cell) |
| A19552_S3                                  | 14  | 106,326,599 | C         | C/C                | C/T         | C/C                 | C/T         | Yes                               |
| <i>Recurrent mutations (n=15)</i>          |     |             |           |                    |             |                     |             |                                   |
| A12851_S2 & A12851_S4                      | 1   | 213,512,146 | C         | C/C                | C/T         | C/C                 | C/T         | Yes                               |
| A12851_S2 & A12851_S4                      | 12  | 17,249,753  | A         | A/A                | A/G         | A/A                 | A/G         | Yes                               |
| A12851_S2 & A12851_S4                      | 12  | 105,146,950 | A         | A/A                | A/G         | A/A                 | A/G         | Yes                               |
| A12851_S2 & A12851_S4                      | 16  | 27,897,755  | C         | C/C                | C/T         | C/C                 | C/T         | Yes                               |
| A12851_S2 & A12851_S4                      | 18  | 52,738,117  | A         | A/A                | A/C         | A/A                 | A/C         | Yes                               |
| A12851_S2 & A12851_S4                      | 2   | 66,348,468  | A         | A/A                | A/T         | A/A                 | A/T         | Yes                               |
| A12851_S2 & A12851_S4                      | 22  | 27,976,252  | T         | T/T                | T/C         | T/T                 | T/C         | Yes                               |
| A12851_S2 & A12851_S4                      | 3   | 137,521,081 | C         | C/C                | C/G         | C/C                 | C/G         | Yes                               |
| A12851_S2 & A12851_S4                      | 4   | 188,079,357 | G         | G/G                | G/A         | G/G                 | G/A         | Yes                               |
| A19552_S1 & A19552_S9                      | 15  | 93,157,749  | T         | T/T                | T/C         | T/T                 | T/C         | Yes                               |
| A19552_S3 & A19552_S9                      | 10  | 120,845,303 | T         | T/T                | T/C         | T/T                 | T/C         | Yes                               |
| A19552_S3 & A19552_S9                      | 17  | 68,893,498  | G         | G/G                | G/T         | G/G                 | G/T         | Yes                               |
| A19553_S1 & A19553_S4                      | 19  | 53,727,460  | C         | C/C                | C/C         | C/C                 | C/T         | No (not confirmed in single cell) |
| A19553_S1 & A19553_S4                      | 3   | 73,231,854  | T         | T/T                | T/T         | T/T                 | T/C         | No (not confirmed in single cell) |
| M2_S1 & M2_S3                              | 9   | 112,192,050 | T         | T/T                | T/C         | T/T                 | T/C         | Yes                               |



**Table S3. Estimation of mutation frequency.**

| Sample <sup>1</sup>    | ≥ 20x in both cell and bulk (mapq≥40) | # somatic SNVs observed | #heterozygous SNPs observed (>20x) <sup>2</sup> | #heterozygous SNPs expected (>20x) <sup>3</sup> | Sensitivity | # SNVs per cell <sup>4</sup> | # SNVs per cell (median by donor) |
|------------------------|---------------------------------------|-------------------------|-------------------------------------------------|-------------------------------------------------|-------------|------------------------------|-----------------------------------|
| C151223 S1             | 1,571,404,579                         | 74                      | 824,244                                         | 1,324,283                                       | 62.2%       | 237.4                        | 482.6                             |
| C151223 S2             | 1,407,517,673                         | 96                      | 656,434                                         | 1,189,007                                       | 55.2%       | 387.6                        |                                   |
| C151223 S3             | 1,416,745,333                         | 152                     | 703,235                                         | 1,206,823                                       | 58.3%       | 577.7                        |                                   |
| C151223 S4             | 1,573,293,541                         | 229                     | 819,420                                         | 1,341,803                                       | 61.1%       | 747.8                        |                                   |
| C70007 S1              | 1,227,419,606                         | 125                     | 576,701                                         | 1,122,501                                       | 51.4%       | 621.9                        | 438.6                             |
| C70007 S10             | 1,140,323,417                         | 76                      | 563,592                                         | 1,050,012                                       | 53.7%       | 389.6                        |                                   |
| C70007 S3              | 1,408,519,765                         | 70                      | 774,251                                         | 1,279,523                                       | 60.5%       | 257.7                        |                                   |
| C70007 S5              | 1,179,938,398                         | 107                     | 640,542                                         | 1,097,902                                       | 58.3%       | 487.7                        |                                   |
| BM1 S1                 | 1,456,638,254                         | 530                     | 743,144                                         | 1,212,073                                       | 61.3%       | 1861.9                       | 988.6                             |
| BM1 S2                 | 1,528,996,911                         | 384                     | 830,222                                         | 1,273,438                                       | 65.2%       | 1208.6                       |                                   |
| BM1 S3                 | 1,472,644,246                         | 227                     | 771,749                                         | 1,226,570                                       | 62.9%       | 768.6                        |                                   |
| BM1 S4                 | 1,840,898,270                         | 286                     | 1,099,974                                       | 1,529,872                                       | 71.9%       | 677.9                        |                                   |
| BF1 S1                 | 1,312,833,732                         | 509                     | 682,593                                         | 1,108,039                                       | 61.6%       | 1974.6                       | 1033.7                            |
| BF1_S2                 | 1,460,764,129                         | 270                     | 804,198                                         | 1,242,333                                       | 64.7%       | 895.9                        |                                   |
| BF1_S3                 | 1,256,329,042                         | 260                     | 650,707                                         | 1,069,533                                       | 60.8%       | 1067.2                       |                                   |
| BF1 S4                 | 1,381,982,739                         | 272                     | 724,479                                         | 1,173,466                                       | 61.7%       | 1000.2                       |                                   |
| BF2 S1                 | 1,581,655,636                         | 423                     | 886,492                                         | 1,344,646                                       | 65.9%       | 1272.7                       | 1659.4                            |
| BF2_S2                 | 1,427,131,060                         | 636                     | 822,311                                         | 1,203,368                                       | 68.3%       | 2046.1                       |                                   |
| BF2_S3                 | 1,290,332,160                         | 3,040                   | 682,979                                         | 1,087,033                                       | 62.8%       | 11764.8                      |                                   |
| BF2 S4                 | 1,313,122,106                         | 313                     | 687,569                                         | 1,103,329                                       | 62.3%       | 1200.1                       |                                   |
| BM2 S1                 | 1,457,490,563                         | 405                     | 784,872                                         | 1,245,017                                       | 63.0%       | 1382.9                       | 1319.3                            |
| BM2 S2                 | 1,620,472,540                         | 455                     | 965,499                                         | 1,376,253                                       | 70.2%       | 1255.7                       |                                   |
| BM2 S3                 | 1,785,876,994                         | 359                     | 1,097,220                                       | 1,513,770                                       | 72.5%       | 870.1                        |                                   |
| BM2 S4                 | 1,501,773,766                         | 766                     | 815,244                                         | 1,282,933                                       | 63.5%       | 2518.4                       |                                   |
| A19505 S1              | 1,296,060,008                         | 455                     | 768,059                                         | 1,281,645                                       | 59.9%       | 1838.0                       | 1916.6                            |
| A19505 S2              | 1,380,890,586                         | 546                     | 840,058                                         | 1,378,973                                       | 60.9%       | 2036.4                       |                                   |
| A19505 S7              | 1,430,702,053                         | 571                     | 889,484                                         | 1,417,298                                       | 62.8%       | 1995.2                       |                                   |
| A19505 S8              | 1,061,742,454                         | 241                     | 569,018                                         | 1,065,182                                       | 53.4%       | 1333.1                       |                                   |
| A13589 S10             | 1,431,047,978                         | 417                     | 793,133                                         | 1,340,534                                       | 59.2%       | 1545.2                       | 1578.7                            |
| A13589 S3              | 1,266,124,779                         | 361                     | 652,656                                         | 1,176,181                                       | 55.5%       | 1612.1                       |                                   |
| A13589 S6              | 1,347,742,050                         | 342                     | 684,695                                         | 1,256,658                                       | 54.5%       | 1461.2                       |                                   |
| A13589 S9              | 1,372,478,203                         | 609                     | 730,853                                         | 1,288,592                                       | 56.7%       | 2454.6                       |                                   |
| A12851 S11             | 1,418,324,811                         | 423                     | 801,580                                         | 1,369,400                                       | 58.5%       | 1598.5                       | 1742.8                            |
| A12851 S2              | 1,254,629,045                         | 356                     | 662,899                                         | 1,203,987                                       | 55.1%       | 1616.9                       |                                   |
| A12851 S4              | 1,151,078,694                         | 362                     | 589,745                                         | 1,116,874                                       | 52.8%       | 1868.6                       |                                   |
| A12851 S7              | 1,258,385,822                         | 612                     | 675,118                                         | 1,218,975                                       | 55.4%       | 2755.1                       |                                   |
| A11365_S1              | 1,436,609,825                         | 370                     | 893,320                                         | 1,437,757                                       | 62.1%       | 1300.5                       | 1540.0                            |
| A11365_S2              | 1,321,850,248                         | 394                     | 791,911                                         | 1,319,848                                       | 60.0%       | 1558.6                       |                                   |
| A11365_S3              | 1,397,013,118                         | 450                     | 864,023                                         | 1,397,317                                       | 61.8%       | 1634.4                       |                                   |
| A11365_S4              | 1,244,224,704                         | 364                     | 749,833                                         | 1,242,788                                       | 60.3%       | 1521.3                       |                                   |
| A19552_S1              | 1,267,579,467                         | 443                     | 585,106                                         | 1,174,838                                       | 49.8%       | 2201.7                       | 2668.7                            |
| A19552_S12             | 1,332,631,539                         | 450                     | 697,243                                         | 1,233,883                                       | 56.5%       | 1874.9                       |                                   |
| A19552_S3              | 1,435,035,445                         | 934                     | 738,583                                         | 1,339,675                                       | 55.1%       | 3703.9                       |                                   |
| A19552_S9              | 1,488,468,771                         | 902                     | 846,100                                         | 1,395,480                                       | 60.6%       | 3135.8                       |                                   |
| A20061 S14             | 1,514,136,235                         | 703                     | 699,023                                         | 1,310,796                                       | 53.3%       | 2731.6                       | 2886.4                            |
| A20061 S16             | 1,514,686,806                         | 1,173                   | 739,836                                         | 1,317,992                                       | 56.1%       | 4328.4                       |                                   |
| A20061 S2              | 1,259,254,624                         | 557                     | 588,634                                         | 1,091,523                                       | 53.9%       | 2573.4                       |                                   |
| A20061 S9              | 1,807,150,211                         | 1,105                   | 987,703                                         | 1,565,734                                       | 63.1%       | 3041.1                       |                                   |
| A19553 S1              | 1,500,661,790                         | 459                     | 842,049                                         | 1,365,666                                       | 61.7%       | 1556.4                       | 4387.6                            |
| A19553 S3              | 1,526,775,807                         | 1,712                   | 832,048                                         | 1,386,375                                       | 60.0%       | 5861.9                       |                                   |
| A19553 S4              | 1,494,660,238                         | 1,045                   | 808,721                                         | 1,355,798                                       | 59.6%       | 3677.5                       |                                   |
| A19553 S7              | 1,446,156,794                         | 1,366                   | 763,845                                         | 1,313,948                                       | 58.1%       | 5097.8                       |                                   |
| A19554 S2              | 1,451,370,561                         | 705                     | 752,270                                         | 1,260,211                                       | 59.7%       | 2553.0                       | 2270.8                            |
| A19554 S4              | 1,416,067,682                         | 470                     | 722,277                                         | 1,223,133                                       | 59.1%       | 1763.4                       |                                   |
| A19554 S7              | 1,362,722,290                         | 506                     | 694,676                                         | 1,185,779                                       | 58.6%       | 1988.6                       |                                   |
| A19554 S8              | 1,306,811,747                         | 959                     | 663,462                                         | 1,136,272                                       | 58.4%       | 3943.2                       |                                   |
| Genome size considered | 3,137,454,505                         |                         |                                                 |                                                 |             |                              |                                   |

<sup>1</sup>Sample ID is given as SubjectID\_CellID. CellID was a randomly assigned number, which does not indicate the number of cells sequenced.<sup>2</sup>Number of heterozygous germline SNPs observed in single cells with Secaller.<sup>3</sup>Number of germline SNPs called by the HaplotypeCaller from the bulk sequencing, and also the loci were sequenced with at least 20x sequencing depth in the single cells.<sup>4</sup>Column 7 = Column 3 / Column 6 \* Column 2 / Genome size.

**Table S4. Hotspots of somatic mutations.**

| ClusterID  | chr | start     | end       | size (bp) | SNV number | Cell number | Mutation frequency per cell per base pair <sup>1</sup>                        | Cell ID (SNV number) <sup>2</sup>                                                                                                                                                                                                                                                                                                                         | Associated gene / loci | Distance to closest ATAC-Seq peak (bp) | Closest TSS         | Distance to closest TSS (bp) | Previous Off target report (AID binding, SHM associated or mutation associated in B cell related tumors)         | POLR2A | YY1 | C/EBP related | E-box binding TFs               |
|------------|-----|-----------|-----------|-----------|------------|-------------|-------------------------------------------------------------------------------|-----------------------------------------------------------------------------------------------------------------------------------------------------------------------------------------------------------------------------------------------------------------------------------------------------------------------------------------------------------|------------------------|----------------------------------------|---------------------|------------------------------|------------------------------------------------------------------------------------------------------------------|--------|-----|---------------|---------------------------------|
| Cluster#1  | 1   | 173836271 | 173837844 | 1573      | 4          | 2           | 4.7x10 <sup>-3</sup> (95%CI: 2.3x10 <sup>-3</sup> – 7.1x10 <sup>-3</sup> )    | <b>A19554_S8</b> (3); A20061_S14 (1)                                                                                                                                                                                                                                                                                                                      | <i>ZBTB37</i>          | 0                                      | <i>ZBTB37</i>       | 0                            | Qian et al., Cell 2014, PMID: 25483777                                                                           | Yes    | Yes | Yes           | BHLHE40,MAX,MYC,TCF12,TCF3,ZEB1 |
| Cluster#2  | 2   | 116202479 | 116205207 | 2728      | 4          | 2           | 2.7x10 <sup>-3</sup> (95%CI: 1.3x10 <sup>-3</sup> – 4.1x10 <sup>-3</sup> )    | <b>F2_S3</b> (1); <b>A19553_S3</b> (3)                                                                                                                                                                                                                                                                                                                    | <i>DPP10</i>           | 90169                                  | <i>DPP10</i>        | 4031                         | Burns et al., Leukemia 2018, PMID: 28584254                                                                      | .      | .   | .             | .                               |
| Cluster#3  | 2   | 125655504 | 125659376 | 3872      | 4          | 2           | 1.9x10 <sup>-3</sup> (95%CI: 0.9x10 <sup>-3</sup> – 2.9x10 <sup>-3</sup> )    | <b>M1_S1</b> (3); A19554_S2 (1)                                                                                                                                                                                                                                                                                                                           | <i>CNTNAP5</i>         | 323016                                 | <i>CNTNAP5</i>      | 676222                       | .                                                                                                                | .      | .   | .             |                                 |
| Cluster#4  | 3   | 187460619 | 187463603 | 2984      | 4          | 2           | 2.5x10 <sup>-3</sup> (95%CI: 1.2x10 <sup>-3</sup> – 3.7x10 <sup>-3</sup> )    | <b>F2_S3</b> (1); <b>A19552_S3</b> (3)                                                                                                                                                                                                                                                                                                                    | <i>BCL6</i>            | 0                                      | <i>BCL6</i>         | 6644                         | Shen et al., Science 1998, PMID: 9624052; Qian et al., Cell 2014, PMID: 25483777; many others                    | Yes    | Yes | Yes           | BHLHE40,GATA3,MAX,MYC,TCF12     |
| Cluster#5  | 3   | 187957868 | 187958890 | 1022      | 4          | 1           | 14.4x10 <sup>-3</sup> (95%CI: 7.2x10 <sup>-3</sup> – 21.8x10 <sup>-3</sup> )  | <b>F2_S3</b> (4)                                                                                                                                                                                                                                                                                                                                          | <i>LPP</i>             | 683                                    | <i>LPP</i>          | 216                          | Schwandt et al., J Neuroopathol Exp Neurol. 2006, PMID: 16896311                                                 | Yes    | .   | .             | TAL1                            |
| Cluster#6  | 4   | 13624125  | 13628378  | 4253      | 4          | 2           | 1.7x10 <sup>-3</sup> (95%CI: 0.9x10 <sup>-3</sup> – 2.6x10 <sup>-3</sup> )    | <b>A19553_S3</b> (3); A20061_S2 (1)                                                                                                                                                                                                                                                                                                                       | <i>BOD1L1</i>          | 370                                    | <i>BOD1L1</i>       | 8995                         | .                                                                                                                | .      | .   | .             |                                 |
| Cluster#7  | 4   | 92286679  | 92290096  | 3417      | 5          | 1           | 5.4x10 <sup>-3</sup> (95%CI: 3.0x10 <sup>-3</sup> – 7.9x10 <sup>-3</sup> )    | <b>F2_S3</b> (5)                                                                                                                                                                                                                                                                                                                                          | <i>CCSER1</i>          | 276003                                 | <i>RP11-763F8.1</i> | 46494                        | .                                                                                                                | .      | .   | .             |                                 |
| Cluster#8  | 4   | 103717626 | 103718274 | 648       | 5          | 1           | 28.6x10 <sup>-3</sup> (95%CI: 15.7x10 <sup>-3</sup> – 41.4x10 <sup>-3</sup> ) | <b>M1_S1</b> (5)                                                                                                                                                                                                                                                                                                                                          | <i>UBE2D3</i>          | 12177                                  | <i>UBE2D3</i>       | 34                           | .                                                                                                                | .      | .   | .             |                                 |
| Cluster#9  | 6   | 31549576  | 31549841  | 265       | 4          | 2           | 28.0x10 <sup>-3</sup> (95%CI: 13.9x10 <sup>-3</sup> – 42.0x10 <sup>-3</sup> ) | <b>F2_S3</b> (1); A19552_S8 (3)                                                                                                                                                                                                                                                                                                                           | <i>LTB</i>             | 239                                    | <i>LTB</i>          | 1175                         | Warzocha et al., Biochem Biophys Res Commun. 1997, PMID: 9299492                                                 | Yes    | .   | .             | .                               |
| Cluster#10 | 7   | 89556243  | 89560623  | 4380      | 4          | 4           | 0.8x10 <sup>-3</sup> (95%CI: 0.4x10 <sup>-3</sup> – 1.3x10 <sup>-3</sup> )    | <b>M1_S2</b> (1); <b>A13589_S9</b> (1); A20061_S16 (1); <b>A20061_S9</b> (1)                                                                                                                                                                                                                                                                              | .                      | 222936                                 | <i>STEAP1</i>       | 223066                       | .                                                                                                                | .      | .   | .             |                                 |
| Cluster#11 | 7   | 122432807 | 122437692 | 4885      | 5          | 2           | 1.9x10 <sup>-3</sup> (95%CI: 1.0x10 <sup>-3</sup> – 2.8x10 <sup>-3</sup> )    | <b>F2_S3</b> (4); <b>A19554_S8</b> (1)                                                                                                                                                                                                                                                                                                                    | <i>CADPS2</i>          | 118617                                 | <i>RNF148</i>       | 91083                        | Burns et al., Leukemia 2018, PMID: 28584254                                                                      | .      | .   | .             | .                               |
| Cluster#12 | 9   | 30538593  | 30542103  | 3510      | 4          | 2           | 2.1x10 <sup>-3</sup> (95%CI: 1.0x10 <sup>-3</sup> – 3.2x10 <sup>-3</sup> )    | <b>F2_S3</b> (3); <b>A19554_S8</b> (1)                                                                                                                                                                                                                                                                                                                    | .                      | 32455                                  | <i>ACO1</i>         | 1842515                      | .                                                                                                                | .      | .   | .             |                                 |
| Cluster#13 | 12  | 19566409  | 19569174  | 2765      | 4          | 2           | 2.6x10 <sup>-3</sup> (95%CI: 1.3x10 <sup>-3</sup> – 4.0x10 <sup>-3</sup> )    | A11365_S3 (1); <b>A19554_S7</b> (3)                                                                                                                                                                                                                                                                                                                       | <i>AEBP2</i>           | 22998                                  | <i>AEBP2</i>        | 9409                         | .                                                                                                                | .      | Yes | .             |                                 |
| Cluster#14 | 12  | 122457912 | 122462446 | 4534      | 6          | 2           | 2.5x10 <sup>-3</sup> (95%CI: 1.4x10 <sup>-3</sup> – 3.5x10 <sup>-3</sup> )    | <b>F2_S3</b> (5); A19552_S9 (1)                                                                                                                                                                                                                                                                                                                           | <i>BCL7A</i>           | 0                                      | <i>BCL7A</i>        | 0                            | Kato et al., Proc Natl Acad Sci U S A. 2012, PMID: 22308462; Qian et al., Cell 2014, PMID: 25483777; many others | Yes    | Yes | Yes           | BHLHE40,GATA3,MAX,MYC           |
| Cluster#15 | 13  | 75983796  | 75984265  | 469       | 5          | 1           | 39.5x10 <sup>-3</sup> (95%CI: 21.9x10 <sup>-3</sup> – 57.1x10 <sup>-3</sup> ) | <b>A19553_S7</b> (5)                                                                                                                                                                                                                                                                                                                                      | <i>TBC1D4</i>          | 14264                                  | <i>TBC1D4</i>       | 96878                        | .                                                                                                                | Yes    | .   | .             |                                 |
| Cluster#16 | 13  | 111053494 | 111057470 | 3976      | 4          | 2           | 1.9x10 <sup>-3</sup> (95%CI: 0.9x10 <sup>-3</sup> – 2.8x10 <sup>-3</sup> )    | <b>A19552_S3</b> (3); A19554_S2 (1); <b>A19553_S3</b> (2); <b>A19553_S7</b> (3); <b>A19554_S7</b> (2)                                                                                                                                                                                                                                                     | <i>COL4A2</i>          | 7184                                   | <i>COL4A2</i>       | 24928                        | .                                                                                                                | Yes    | .   | .             |                                 |
| Cluster#17 | 14  | 106112047 | 106114148 | 2101      | 7          | 3           | 4.1x10 <sup>-3</sup> (95%CI: 2.5x10 <sup>-3</sup> – 5.7x10 <sup>-3</sup> )    | <b>A19554_S7</b> (2); <b>A19552_S3</b> (3); <b>A19553_S3</b> (3); <b>A19554_S7</b> (1); <b>A20061_S9</b> (4); <b>F2_S3</b> (6); <b>M1_S1</b> (1); <b>A13589_S9</b> (1); <b>A19553_S7</b> (1); <b>A20061_S9</b> (1); <b>C70007_S3</b> (1); A19505_S2 (1); A19552_S1 (1); A19552_S9 (1); A11365_S4 (1); <b>A19554_S8</b> (2); A20061_S16 (1); A19554_S4 (4) | <i>IGH</i>             | 562                                    | <i>TMEM121</i>      | 117086                       | Not applicable                                                                                                   | Yes    | .   | .             |                                 |
| Cluster#18 | 14  | 106324287 | 106329284 | 4997      | 11         | 4           | 2.0x10 <sup>-3</sup> (95%CI: 1.4x10 <sup>-3</sup> – 2.7x10 <sup>-3</sup> )    | <b>A19552_S3</b> (3); <b>A19553_S3</b> (3); <b>A19554_S7</b> (1); <b>A20061_S9</b> (4); <b>F2_S3</b> (6); <b>M1_S1</b> (1); <b>A13589_S9</b> (1); <b>A19553_S7</b> (1); <b>A20061_S9</b> (1); <b>C70007_S3</b> (1); A19505_S2 (1); A19552_S1 (1); A19552_S9 (1); A11365_S4 (1); <b>A19554_S8</b> (2); A20061_S16 (1); A19554_S4 (4)                       | <i>IGH - Sμ</i>        | 0                                      | <i>KIAA0125</i>     | 54554                        | Not applicable                                                                                                   | Yes    | Yes | Yes           | BHLHE40,MAX,TCF12,TCF3          |
| Cluster#19 | 14  | 107175732 | 107179846 | 4114      | 10         | 5           | 1.8x10 <sup>-3</sup> (95%CI: 1.2x10 <sup>-3</sup> – 2.4x10 <sup>-3</sup> )    | <b>A19553_S7</b> (1); <b>A20061_S9</b> (1); <b>C70007_S3</b> (1); A19505_S2 (1); A19552_S1 (1); A19552_S9 (1); A11365_S4 (1); <b>A19554_S8</b> (2); A20061_S16 (1); A19554_S4 (4)                                                                                                                                                                         | <i>IGH</i>             | 5139                                   | <i>KIAA0125</i>     | 787755                       | Not applicable                                                                                                   | Yes    | Yes | .             | .                               |
| Cluster#20 | 15  | 93157391  | 93160422  | 3031      | 4          | 4           | 1.2x10 <sup>-3</sup> (95%CI: 0.6x10 <sup>-3</sup> – 1.8x10 <sup>-3</sup> )    | <b>A19552_S3</b> (3); <b>M1_S1</b> (1); <b>A12851_S7</b> (2); <b>A19552_S3</b> (1); <b>A19553_S4</b> (3); <b>A19554_S7</b> (1); <b>A20061_S9</b> (1)                                                                                                                                                                                                      | <i>FAM174B</i>         | 180029                                 | <i>FAM174B</i>      | 251                          | .                                                                                                                | .      | .   | GATA3         |                                 |
| Cluster#21 | 16  | 6414678   | 6417154   | 2476      | 4          | 3           | 2.0x10 <sup>-3</sup> (95%CI: 1.0x10 <sup>-3</sup> – 3.0x10 <sup>-3</sup> )    | <b>A19552_S3</b> (3); <b>M1_S1</b> (1); <b>A12851_S7</b> (2); <b>A19552_S3</b> (1); <b>A19553_S4</b> (3); <b>A19554_S7</b> (1); <b>A20061_S9</b> (1)                                                                                                                                                                                                      | <i>RBFOX1</i>          | 1265963                                | <i>RBFOX1</i>       | 116026                       | Ramsay et al., Leukemia. 2013, PMID: 23187293                                                                    | .      | .   | .             | .                               |
| Cluster#22 | 17  | 60259020  | 60261519  | 2499      | 4          | 1           | 5.9x10 <sup>-3</sup> (95%CI: 2.9x10 <sup>-3</sup> – 8.9x10 <sup>-3</sup> )    | <b>F2_S3</b> (3); <b>M1_S1</b> (1); <b>A12851_S7</b> (2); <b>A19552_S3</b> (1); <b>A19553_S4</b> (3); <b>A19554_S7</b> (1); <b>A20061_S9</b> (1)                                                                                                                                                                                                          | .                      | 71821                                  | <i>RP11-51L5.7</i>  | 88329                        | .                                                                                                                | .      | .   | .             |                                 |
| Cluster#23 | 22  | 23228043  | 23237013  | 8970      | 12         | 7           | 0.7x10 <sup>-3</sup> (95%CI: 0.5x10 <sup>-3</sup> – 0.9x10 <sup>-3</sup> )    | <b>F1_S1</b> (1); <b>A19552_S3</b> (4); <b>A19554_S8</b> (2)                                                                                                                                                                                                                                                                                              | <i>IGL - JGLL5</i>     | 458                                    | <i>JGLL5</i>        | 0                            | Not applicable                                                                                                   | Yes    | Yes | .             | .                               |
| Cluster#24 | 22  | 23278327  | 23285767  | 7440      | 7          | 3           | 1.1x10 <sup>-3</sup> (95%CI: 0.7x10 <sup>-3</sup> – 1.6x10 <sup>-3</sup> )    | <b>F1_S1</b> (1); <b>A19552_S3</b> (4); <b>A19554_S8</b> (2)                                                                                                                                                                                                                                                                                              | <i>IGL</i>             | 0                                      | <i>JGLL5</i>        | 0                            | Not applicable                                                                                                   | Yes    | Yes | Yes           | BHLHE40,MAX,MYC,TCF12,TCF3,ZEB1 |

**FDR of mutation hotspots.**

| #SNVs in cluster | FDR    |
|------------------|--------|
| ≥4               | 0.0568 |
| ≥5               | 0.0057 |
| ≥6               | 0.0003 |
| ≥7               | <1E-4  |

<sup>1</sup>Mutation frequencies per cell per base pair were adjusted by sensitivity shown in Table S3.

<sup>2</sup>SHM+ cells are written in bold.

**Table S5. Summary of bisulfite, RNA and ATAC sequencing.**

| <b>Bisulfite sequencing</b> |                                   |               |          |        |             |                 |                           |                 |                                     |                  |                                             |                          |                                                                                                                           |
|-----------------------------|-----------------------------------|---------------|----------|--------|-------------|-----------------|---------------------------|-----------------|-------------------------------------|------------------|---------------------------------------------|--------------------------|---------------------------------------------------------------------------------------------------------------------------|
| Sample ID                   | Description                       | Data resource | Donor ID | Gender | Age (years) | Cell type       | Other                     | # Reads         | # Mapped reads                      | Duplication rate | Bisulfite conversion rate <sup>1</sup>      | # C on CpG covered (≥5x) | Link to data                                                                                                              |
| WGBS01                      | Whole genome bisulfite sequencing | ENCODE        | -        | Male   | 37          | B cells (CD19+) | Read end #1               | 412,829,914     | 331,338,617                         | 15.30%           | 99.30%                                      | 38,173,877               | <a href="https://www.encodeproject.org/experiments/ENCSR284TCU">https://www.encodeproject.org/experiments/ENCSR284TCU</a> |
|                             |                                   |               |          |        |             |                 | Read end #2               | 412,829,914     | 329,630,675                         | 17.43%           | 99.00%                                      |                          |                                                                                                                           |
| <b>RNA sequencing</b>       |                                   |               |          |        |             |                 |                           |                 |                                     |                  |                                             |                          |                                                                                                                           |
| Sample ID                   | Description                       | Data resource | Donor ID | Gender | Age (years) | Cell type       | Other                     | # Reads (pairs) | # Mapped reads (pairs)              | Duplication rate | -                                           | -                        | Link to data                                                                                                              |
| F1RNA1                      | rRNA-depletion RNA-seq            | New data      | F1       | Female | 30          | B cells (CD19+) | Replicate #1 <sup>2</sup> | 39,208,302      | 36,415,872                          | 43.84%           | -                                           | -                        | -                                                                                                                         |
| F1RNA2                      | rRNA-depletion RNA-seq            | New data      |          |        |             |                 | Replicate #2              | 30,520,174      | 28,846,722                          | 21.82%           | -                                           | -                        | -                                                                                                                         |
| M2RNA1                      | rRNA-depletion RNA-seq            | New data      | M2       | Male   | 61          | B cells (CD19+) | Replicate #1              | 21,782,492      | 20,458,640                          | 6.85%            | -                                           | -                        | -                                                                                                                         |
| M2RNA2                      | rRNA-depletion RNA-seq            | New data      |          |        |             |                 | Replicate #2              | 20,446,244      | 19,165,901                          | 7.27%            | -                                           | -                        | -                                                                                                                         |
| <b>ATAC sequencing</b>      |                                   |               |          |        |             |                 |                           |                 |                                     |                  |                                             |                          |                                                                                                                           |
| Sample ID                   | Description                       | Data resource | Donor ID | Gender | Age (years) | Cell type       | Other                     | # Reads (pairs) | # Useful reads (pairs) <sup>3</sup> | # Peaks called   | % Peaks overlap with TF (>50%) <sup>4</sup> | % Reads in peaks         | % peaks in Mapability=100% regions                                                                                        |
| F1ATAC                      | ATAC sequencing                   | New data      | F1       | Female | 30          | B cells         | -                         | 29,281,560      | 8,934,824                           | 53,934           | 89.58%                                      | 42.69%                   | 95.42%                                                                                                                    |
| M2ATAC                      | ATAC sequencing                   | New data      | M2       | Male   | 61          | (CD19+)         | -                         | 95,351,699      | 12,127,499                          | 38,212           | 90.49%                                      | 18.66%                   | 95.54%                                                                                                                    |

<sup>1</sup>Bisulfite conversion rate was estimated as 1 - % of nonCpG methylation.

<sup>2</sup>Replicates #1 and #2 were from two separate blood draws.

<sup>3</sup>After filtering out reads which are duplications, mapq≤30, discoordinate aligned pairs or aligned to MT .chromosome

<sup>4</sup>Fraction of peaks overlap with TF binding regions identified with ChIP sequencing or array by ENCODE (<http://hgdownload.cse.ucsc.edu/goldenpath/hg19/encodeDCC/wgEncodeRegTfbsClustered/>).

**Table S6. Average number of functional SNVs per cell.**

| Type                                   | Age: 0 year |                     | 27-30 years  |           | 52-75 years   |           | 97-106 years  |           |
|----------------------------------------|-------------|---------------------|--------------|-----------|---------------|-----------|---------------|-----------|
|                                        | Total       | Active <sup>d</sup> | Total        | Active    | Total         | Active    | Total         | Active    |
| Total                                  | 463.4±179.0 | -                   | 1181.9±484.7 | -         | 2101.7±2106.1 | -         | 3127.0±1237.1 | -         |
| TF binding region (ENCODE)             | 79.6±39.8   | -                   | 169.4±57.4   | -         | 300.1±302.3   | -         | 435.9±133.3   | -         |
| Open chromatin region (ATAC-Seq)       | -           | 5.4±5.8             | -            | 11.5±4.4  | -             | 17.6±24.9 | -             | 24.5±15.8 |
| Promoter [From -1500 to +500bp of TSS] | 30.9±16.5   | 17.7±10.1           | 43.6±14.4    | 19.6±7.4  | 70.6±63.8     | 33.1±34.9 | 114.3±47.8    | 56.9±26.9 |
| 5' UTR                                 | 3.6±4.8     | 2.1±3.5             | 3.7±5.4      | 2.5±4.0   | 7.5±7.1       | 3.9±5.7   | 11.2±9.1      | 4.9±5.7   |
| Nonsynonymous                          | 3.8±4.7     | 2.2±4.1             | 4.8±5.3      | 1.7±2.5   | 11.4±8.5      | 5.4±5.3   | 21.1±11.4     | 9.2±6.8   |
| Synonymous                             | 2.4±3.3     | 1.5±2.1             | 4.3±4.1      | 1.8±3.0   | 4.3±4.8       | 1.8±2.8   | 10.1±6.5      | 4.3±4.0   |
| Ka/Ks ratio                            | 0.5         | 0.53                | 0.35         | 0.32      | 0.83          | 0.87      | 0.68          | 0.7       |
| LOF SNV <sup>a</sup>                   | 0.4±1.1     | 0.4±1.1             | 0.4±1.2      | 0.0±0.0   | 0.6±1.7       | 0.6±1.7   | 1.5±2.8       | 0.5±1.4   |
| Damaging <sup>b</sup>                  | 3.4±3.0     | 1.3±2.8             | 4.0±5.3      | 1.7±2.5   | 9.1±8.2       | 4.0±5.0   | 14.7±8.5      | 6.5±5.5   |
| Tolerated <sup>c</sup>                 | 0.9±1.6     | 0.9±1.6             | 1.3±2.9      | 0.5±1.5   | 3.5±3.7       | 2.0±2.6   | 7.6±6.1       | 3.4±3.3   |
| Intronic                               | 184.6±72.3  | -                   | 407.8±153.8  | -         | 682.3±674.4   | -         | 1021.4±384.7  | -         |
| 3' UTR                                 | 8.7±6.2     | 4.6±5.9             | 15.3±10.4    | 11.0±11.9 | 22.5±23.7     | 10.9±11.2 | 29.8±11.4     | 13.6±6.5  |

<sup>a</sup> Loss of function SNVs, including stop gain, stop loss and splicing alterations

<sup>b</sup> SNVs annotated as damaging by SIFT or Deleterious by PROVEAN

<sup>c</sup> SNVs annotated as tolerated by SIFT and Neutral by PROVEAN

<sup>d</sup> The number of mutations in transcribed or open chromatin regions in B lymphocytes

Table S7. Prediction of functionality of SNVs on proteins using SIFT and PROVEAN.

| Chr | Pos       | Ref | Mut | Cell       | PROTEIN_ID     | GENE_NAME | LENGT | STRAN | CODON_CHANGE | POS  | RESIDUE_REF | RESIDUE_AL | TYPE             | PROVEAN.SCOR     |                 | PROVEAN.PREDICTIO |                 | SIFT.SCOR |                 | SIFT.PREDICTIO |                 |
|-----|-----------|-----|-----|------------|----------------|-----------|-------|-------|--------------|------|-------------|------------|------------------|------------------|-----------------|-------------------|-----------------|-----------|-----------------|----------------|-----------------|
|     |           |     |     |            |                |           |       |       |              |      |             |            |                  | E                | N (cutOff=-2.5) | E                 | N (cutOff=0.05) | E         | N (cutOff=0.05) | E              | N (cutOff=0.05) |
| 1   | 8397997   | G   | A   | A19552 S1  | ENSP0000366699 | SLC45A1   | 782   | 1     | GGC GT[G]A/C | 607  | V           | V          | Synonymous       | 0                | Neutral         | 1                 | Tolerated       |           |                 |                |                 |
| 1   | 9109178   | G   | A   | A12851 S11 | ENSP0000440688 | SLC2A5    | 442   | -1    | TTG [C]G/TTC | 33   | L           | V          | Single AA Change | -0.39            | Neutral         | 0                 | Damaging        |           |                 |                |                 |
| 1   | 16065109  | G   | A   | A19553 S3  | ENSP0000294454 | SLC25A3A  | 304   | 1     | ACG TG[G]A/C | 206  | W           | *          | Nonsense         | NA               | NA              | NA                | NA              |           |                 |                |                 |
| 1   | 18809069  | G   | A   | M1 S2      | ENSP0000383505 | KLHDC7A   | 777   | 1     | CGG [G]A/GC  | 532  | G           | S          | Single AA Change | -5.52            | Deleterious     | 0.006             | Damaging        |           |                 |                |                 |
| 1   | 18809112  | C   | A   | M1 S2      | ENSP0000383505 | KLHDC7A   | 777   | 1     | GTG T[C]A/C  | 546  | S           | Y          | Single AA Change | -3.19            | Deleterious     | 0.024             | Damaging        |           |                 |                |                 |
| 1   | 37945960  | C   | T   | A20661 S2  | ENSP0000362174 | ZC3H12A   | 599   | 1     | CGG GG[C]T   | 171  | G           | Y          | Synonymous       | 0                | Neutral         | 1                 | Tolerated       |           |                 |                |                 |
| 1   | 44820656  | G   | A   | A19552 S1  | ENSP0000361331 | ER13      | 337   | -1    | CGG [C]T/C   | 15   | P           | S          | Single AA Change | -0.15            | Neutral         | 0.09              | Tolerated       |           |                 |                |                 |
| 1   | 47400169  | T   | G   | A12851 S2  | ENSP0000360971 | CYP4A11   | 520   | -1    | AAG [A]C/GG  | 286  | R           | R          | Synonymous       | 0                | Neutral         | 0.475             | Tolerated       |           |                 |                |                 |
| 1   | 62190933  | C   | T   | A19554 S4  | ENSP0000360222 | TM2D1     | 269   | -1    | CAC [G]A/GC  | 16   | G           | R          | Single AA Change | -0.22            | Neutral         | 0.564             | Tolerated       |           |                 |                |                 |
| 1   | 72489866  | G   | A   | F2 S1      | ENSP0000359827 | FAM73A    | 632   | 1     | GCA [G]A/GC  | 49   | A           | T          | Single AA Change | -1.24            | Neutral         | 0.028             | Damaging        |           |                 |                |                 |
| 1   | 113059977 | C   | A   | A19554 S8  | ENSP0000358698 | WNT2B     | 391   | 1     | TCT [C]A/GA  | 306  | P           | T          | Single AA Change | -7.07            | Deleterious     | 0.001             | Damaging        |           |                 |                |                 |
| 1   | 117944899 | G   | A   | A11365 S1  | ENSP0000348959 | MAN1A2    | 641   | 1     | GAG [G]A/JA  | 132  | E           | K          | Single AA Change | -1.17            | Neutral         | 0.086             | Tolerated       |           |                 |                |                 |
| 1   | 145584219 | G   | C   | M2 S4      | ENSP0000376765 | PIA53     | 628   | 1     | TCA [G]C/TG  | 457  | D           | H          | Single AA Change | -4.08            | Deleterious     | 0                 | Damaging        |           |                 |                |                 |
| 1   | 147231031 | G   | A   | F2 S3      | ENSP0000271348 | GJA5      | 328   | -1    | AAG [C]T/GC  | 106  | R           | C          | Single AA Change | -6.24            | Deleterious     | 0.008             | Damaging        |           |                 |                |                 |
| 1   | 149857828 | C   | T   | A19552 S3  | ENSP0000358151 | HIST2HBE  | 126   | -1    | ACC A[A]G/A  | 121  | K           | K          | Synonymous       | 0                | Neutral         | 1                 | Tolerated       |           |                 |                |                 |
| 1   | 151271294 | C   | T   | A19552 S12 | ENSP0000271657 | PI4KB     | 828   | -1    | CAA [G]A/TC  | 681  | V           | I          | Single AA Change | -0.95            | Neutral         | 0.043             | Damaging        |           |                 |                |                 |
| 1   | 151503174 | G   | A   | A19552 S9  | ENSP0000271636 | CGN       | 1203  | 1     | CTG GA[G]A   | 841  | E           | E          | Synonymous       | 0                | Neutral         | 1                 | Tolerated       |           |                 |                |                 |
| 1   | 153916844 | C   | T   | A19554 S2  | ENSP0000354597 | DENN4B    | 1496  | -1    | GGG [G]A/G   | 3    | E           | K          | Single AA Change | -3.1             | Deleterious     | 0.002             | Damaging        |           |                 |                |                 |
| 1   | 154516452 | G   | A   | A19505 S2  | ENSP0000357465 | TRDR10    | 366   | 1     | CTG [G]A/TG  | 173  | V           | M          | Single AA Change | -0.91            | Neutral         | 0.01              | Damaging        |           |                 |                |                 |
| 1   | 157667480 | T   | A   | F2 S3      | ENSP0000357169 | FCRL3     | 742   | -1    | GAA GT[A]T   | 176  | V           | V          | Synonymous       | 0                | Neutral         | 0.606             | Tolerated       |           |                 |                |                 |
| 1   | 161068386 | G   | A   | F2 S3      | ENSP0000356990 | KLHDC9    | 349   | 1     | GTG [G]A/GC  | 21   | A           | T          | Single AA Change | -0.66            | Neutral         | 0.009             | Damaging        |           |                 |                |                 |
| 1   | 162344004 | C   | A   | A19553 S7  | ENSP0000356912 | C1orf111  | 261   | -1    | ATC A[G]T/G  | 207  | R           | M          | Single AA Change | -3.53            | Deleterious     | 0.002             | Damaging        |           |                 |                |                 |
| 1   | 16175230  | T   | C   | F2 S4      | ENSP0000294816 | LMX1A     | 382   | -1    | ATT [A]G/TG  | 287  | M           | V          | Single AA Change | -1.38            | Neutral         | 0.039             | Damaging        |           |                 |                |                 |
| 1   | 168073904 | C   | T   | A19505 S1  | ENSP0000441039 | GPR161    | 549   | -1    | CTC A[G]A/C  | 82   | S           | N          | Single AA Change | -2.17            | Neutral         | 0.002             | Damaging        |           |                 |                |                 |
| 1   | 176738833 | G   | T   | A19553 S3  | ENSP0000356634 | PAPPA2    | 1791  | 1     | TTG [G]T/TG  | 1472 | V           | L          | Single AA Change | -2.01            | Neutral         | 0.007             | Damaging        |           |                 |                |                 |
| 1   | 180910339 | G   | A   | A19554 S4  | ENSP0000356560 | KIAA1614  | 1190  | 1     | CGC A[G]A/C  | 1026 | S           | N          | Single AA Change | -2.28            | Neutral         | 0.006             | Damaging        |           |                 |                |                 |
| 1   | 181762879 | G   | T   | A12851 S4  | ENSP0000356545 | CACNA1E   | 2313  | 1     | CAT [G]T/CG  | 1993 | A           | S          | Single AA Change | -0.44            | Neutral         | 0.796             | Tolerated       |           |                 |                |                 |
| 1   | 201061166 | A   | G   | A19552 S9  | ENSP0000355192 | CACNA1S   | 1873  | -1    | GGC [T]C/TG  | 159  | L           | L          | Synonymous       | 0                | Neutral         | 0.344             | Tolerated       |           |                 |                |                 |
| 1   | 204224800 | A   | T   | A19554 S8  | ENSP0000407638 | PLEKHA6   | 151   | -1    | GAA C[T]A/T  | 74   | L           | H          | Single AA Change | -1.94            | Neutral         | 0.007             | Damaging        |           |                 |                |                 |
| 1   | 206634596 | G   | A   | C70007 S3  | ENSP0000295713 | SRGAP2    | 985   | 1     | GCT G[G]A/G  | 930  | G           | E          | Single AA Change | 0                | Neutral         | 0.016             | Damaging        |           |                 |                |                 |
| 1   | 208390671 | G   | C   | A19552 S9  | ENSP0000356000 | PLXNA2    | 1894  | -1    | CTG T[C]G/G  | 199  | S           | S          | Synonymous       | 0                | Neutral         | 1                 | Tolerated       |           |                 |                |                 |
| 1   | 209799154 | G   | C   | A19554 S8  | ENSP0000348384 | LAMB3     | 1172  | -1    | AAT G[C]G/G  | 605  | A           | A          | Synonymous       | 0                | Neutral         | 1                 | Tolerated       |           |                 |                |                 |
| 1   | 210856914 | G   | A   | A19553 S7  | ENSP0000271751 | KCNH1     | 989   | -1    | GAC A[A]C/T  | 893  | N           | N          | Synonymous       | 0                | Neutral         | 0.804             | Tolerated       |           |                 |                |                 |
| 1   | 225707039 | G   | A   | A19552 S3  | ENSP0000284653 | ENAH      | 817   | -1    | GAA C[G]C/T  | 270  | R           | R          | Synonymous       | 0                | Neutral         | 1                 | Tolerated       |           |                 |                |                 |
| 1   | 228467712 | G   | A   | C151223 S4 | ENSP0000455507 | OBSCN     | 8678  | 1     | CTC C[G]A/C  | 2713 | R           | R          | Synonymous       | 0                | Neutral         | 0.547             | Tolerated       |           |                 |                |                 |
| 1   | 228482627 | T   | C   | A19552 S12 | ENSP0000455007 | OBSCN     | 8678  | 1     | ACT G[C]T/G  | 402  | L           | L          | Single AA Change | 0                | Neutral         | 1                 | Tolerated       |           |                 |                |                 |
| 1   | 32534982  | T   | A   | A20661 S9  | ENSP0000262861 | SIPA1L2   | 1722  | -1    | GTG C[A]T/GA | 4687 | Q           | L          | Single AA Change | -2.79            | Deleterious     | 0.062             | Tolerated       |           |                 |                |                 |
| 1   | 325634178 | G   | T   | A11365 S3  | ENSP0000355559 | BGALNT2   | 500   | -1    | GTT [C]A/TC  | 250  | L           | I          | Single AA Change | -0.48            | Neutral         | 0.426             | Tolerated       |           |                 |                |                 |
| 1   | 326906246 | G   | A   | A13589 S10 | ENSP0000355537 | ACTN2     | 891   | 1     | TAC GA[G]A/G | 386  | E           | E          | Synonymous       | 0                | Neutral         | 1                 | Tolerated       |           |                 |                |                 |
| 2   | 27282256  | G   | C   | A19553 S3  | ENSP0000353249 | AGBL5     | 886   | 1     | CGG G[T]G/C  | 691  | V           | V          | Synonymous       | 0                | Neutral         | NA                | NA              |           |                 |                |                 |
| 2   | 27465683  | T   | C   | M2 S1      | ENSP0000405416 | CAD       | 293   | 1     | ATG [T]C/GG  | 176  | W           | R          | Single AA Change | -0.5             | Neutral         | 0.461             | Tolerated       |           |                 |                |                 |
| 2   | 34352619  | G   | C   | A19553 S1  | ENSP0000282388 | ZFP62L    | 494   | -1    | GGC GG[C]G   | 108  | G           | G          | Synonymous       | 0                | Neutral         | 1                 | Tolerated       |           |                 |                |                 |
| 2   | 110372351 | G   | C   | A19552 S3  | ENSP0000365830 | ANKRD57   | 525   | 1     | CCG C[C]G/C  | 95   | P           | P          | Synonymous       | 0                | Neutral         | 1                 | Tolerated       |           |                 |                |                 |
| 2   | 136570529 | T   | A   | A11365 S2  | ENSP0000388225 | LCT       | 1003  | -1    | [A]T/JG      | GTG  | 1           | K          | *                | Nonsense         | NA              | NA                | NA              | NA        |                 |                |                 |
| 2   | 175939372 | C   | T   | F1 S3      | ENSP0000264110 | ATF2      | 622   | 1     | AAG [G]A/CT  | 495  | A           | T          | Single AA Change | -0.1             | Neutral         | 0.407             | Tolerated       |           |                 |                |                 |
| 2   | 179638333 | G   | C   | A19552 S12 | ENSP0000343764 | TTN       | 33423 | -1    | GAA [C]G/JA  | ATC  | 2484        | Q          | E                | Single AA Change | -1.86           | Neutral           | 1               | Tolerated |                 |                |                 |
| 2   | 215301356 | T   | C   | F2 S3      | ENSP0000308976 | VWCL2     | 222   | 1     | CCC [T]C/CT  | 132  | S           | P          | Single AA Change | -3.67            | Deleterious     | 0.004             | Damaging        |           |                 |                |                 |
| 2   | 219754945 | C   | T   | A19554 S8  | ENSP0000258411 | WNT10A    | 417   | 1     | CTG [C]T/JG  | 206  | Q           | *          | Nonsense         | NA               | NA              | NA                | NA              |           |                 |                |                 |
| 2   | 220162755 | G   | A   | F2 S1      | ENSP0000295718 | PTPRN     | 979   | -1    | CTC A[C]T/T  | 580  | T           | I          | Single AA Change | -4.51            | Deleterious     | 0.095             | Tolerated       |           |                 |                |                 |
| 2   | 220409590 | G   | A   | M1 S3      | ENSP0000343507 | TMEM198   | 360   | 1     | TGT T[T]G/A  | 17   | L           | L          | Synonymous       | 0                | Neutral         | 1                 | Tolerated       |           |                 |                |                 |
| 2   | 232827663 | G   | T   | A11365 S2  | ENSP0000295550 | COL6A3    | 317   | -1    | GGT [C]A/T   | GTG  | 705         | H          | N                | Single AA Change | -3.66           | Deleterious       | 0.259           | Tolerated |                 |                |                 |
| 3   | 7503306   | G   | C   | A19554 S8  | ENSP0000434573 | GRM7      | 924   | 1     | AAC G[G]C/G  | 471  | G           | A          | Single AA Change | -5.74            | Deleterious     | 0.01              | Damaging        |           |                 |                |                 |
| 3   | 7620638   | G   | A   | A19505 S1  | ENSP0000434573 | GRM7      | 924   | 1     | TAT C[G]A/CT | 682  | R           | H          | Single AA Change | -4.86            | Deleterious     | 0                 | Damaging        |           |                 |                |                 |
| 3   | 10016121  | G   | C   | A12851 S11 | ENSP0000245046 | TMEM111   | 261   | -1    | CTC [C]G/T   | ATG  | 120         | P          | R                | Single AA Change | -8.55           | Deleterious       | 0               | Damaging  |                 |                |                 |
| 3   | 25502732  | C   | T   | A19554 S8  | ENSP0000385865 | RARB      | 455   | 1     | CCC [C]T/A   | TCT  | 76          | P          | L                | Single AA Change | -6.3            | Deleterious       | 0.024           | Damaging  |                 |                |                 |
| 3   | 38307443  | T   | G   | A11365 S1  | ENSP0000310241 | SLC22A13  | 551   | 1     | TTT C[T]G/G  | TCT  | 31          | L          | R                | Single AA Change | -4.44           | Deleterious       | 0.004           | Damaging  |                 |                |                 |
| 3   | 37033174  | G   | A   | A19505 S2  | ENSP0000415034 | NBEAL2    | 2750  | 1     | AGC A[T]G/A  | CTC  | 307         | M          | I                | Single AA Change | -2.34           | Neutral           | 0.162           | Tolerated |                 |                |                 |
| 3   | 52835066  | C   | A   | A20661 S16 | ENSP0000415769 | ITH3      | 890   | 1     | GGC A[A]C/A  | ATC  | 429         | N          | K                | Single AA Change | -1.6            | Neutral           | 0.277           | Tolerated |                 |                |                 |
| 3   | 58319336  | G   | A   | F2 S1      | ENSP0000418831 | PXK       | 113   | 1     | GGT C[T]G/A  | CAG  | 20          | L          | L                | Synonymous       | 0               | Neutral           | 1               | Tolerated |                 |                |                 |
| 3   | 113375453 | G   | A   | C70007 S3  | ENSP0000320794 | KIAA2018  | 2245  | -1    | GGT T[C]T/A  | AGC  | 1692        | S          | S                | Synonymous       | 0               | Neutral           | 1               | Tolerated |                 |                |                 |
| 3   | 113441767 | T   | C   | A19552 S12 | ENSP0000450922 | NAA50     | 169   | -1    | GAT G[A]G/C  | ATT  | 108         | S          | S                | Single AA Change | 0.46            | Neutral           | 1               | Tolerated |                 |                |                 |
| 3   | 123688909 | T   | C   | A3589 S9   | ENSP0000184183 | ROPN1     | 212   | -1    | ACT C[T]A/G  | AAC  | 184         | L          | L                | Synonymous       | 0               | Neutral           | 1               | Tolerated |                 |                |                 |
| 3   | 128341246 | C   | T   | A12851 S4  | ENSP0000296255 | RPN1      | 607   | -1    | CTG [G]A/GC  | GCA  | 468         | A          | T                | Single AA Change | -1.82           | Neutral           | 0.017           | Damaging  |                 |                |                 |
| 3   | 129152803 | G   | C   | A151223 S3 | ENSP0000249910 | MBD4      | 580   | -1    | AAA G[C]T/C  | TTT  | 434         | A          | V                | Single AA Change | -1.35           | Neutral           | 0.065           | Tolerated |                 |                |                 |
| 3   | 183210322 | G   | C   | A20661 S16 | ENSP0000341342 | KLHL6     | 621   | -1    | AAA T[G]C/G  | ATC  | 508         | C          | W                | Single AA Change | -7.6            | Deleterious       | 0               | Damaging  |                 |                |                 |
| 3   | 184086059 | C   | T   | A13589 S10 | ENSP0000415536 | POLR2H    | 175   | 1     | TCT C[C]T/T  | GAT  | 165         | P          | L                | Single AA Change | 0.54            | Neutral           | 0               | Damaging  |                 |                |                 |
| 3   | 196509567 | G   | C   | A20661 S14 | ENSP0000314067 | PAK2      | 524   | 1     | CTG C[G]C/A  | ATG  | 17          | R          | P                | Single AA Change | -5.97           | Deleterious       | 0               | Damaging  |                 |                |                 |
| 4   | 6374374   | G   | T   | A19554 S4  | ENSP0000335083 | PPP2R2C   | 447   | -1    | AGG A[T]C/A  | TTT  | 167         | I          | I                | Synonymous       | 0               | Neutral           | 0.853           | Tolerated |                 |                |                 |
| 4   | 36345255  | C   | T   | F2 S3      | ENSP0000424426 | DTHD1     | 821   | 1     | GAT [C]T/TG  | AGA  | 759         | L          | F                | Single AA Change | -2.41           | Neutral           | 0.032           | Damaging  |                 |                |                 |
| 4   | 69535669  | A   | T   | A20661 S2  | ENSP0000341045 | UGT2B15   | 530   | -1    | GAC T[T]A/T  | TGG  | 223         | F          | Y                | Single AA Change | -1.99           | Neutral           | 0.281           | Tolerated |                 |                |                 |
| 4   | 71508941  | T   | C   | A19554 S2  | ENSP0000379383 | ENAM      | 1142  | 1     | TTT [T]C/AC  | CTC  | 600         | Y          | H                | Single AA Change | -4.71           | Deleterious       | 0.02            | Damaging  |                 |                |                 |
| 4   | 79831960  | C   | T   | F2 S1      | ENSP0000334836 | BMP2K     | 1161  | 1     | AAG A[G]C/T  | AGT  | 753         | S          | S                | Synonymous       | 0               | Neutral           | 1               | Tolerated |                 |                |                 |
| 4   | 104072028 | G   | T   | A20661 S16 | ENSP0000264360 | PCHD10    | 1040  | 1     | AAT [G]T/JA  | CAAT | 245         | D          | Y                | Single AA Change | -8.67           | Deleterious       | 0               | Damaging  |                 |                |                 |
| 4   | 143226864 | G   | A   | A19553 S3  | ENSP0000421065 | INPP4B    | 686   | -1    | ATC [C]T/TA  | CCC  | 9           | L          | L                | Synonymous       | 0               | Neutral           | 0               | Damaging  |                 |                |                 |
| 4   | 153893618 | C   | T   | A19505 S8  | ENSP0000260008 | FHDC1     | 1143  | 1     | GAA G[A]C/T  | AAA  | 436         | D          | D                | Synonymous       | 0               | Neutral           | 1               | Tolerated |                 |                |                 |
| 4   | 154533494 | T   | G   | F2 S3      | ENSP0000386787 | KIAA0922  | 1610  | 1     | AAG A[T]G/T  | CAC  | 1170        | I          | S                | Single AA Change | -0.01           | Neutral           | 0.098           | Tolerated |                 |                |                 |
| 5   | 2749717   | C   | T   | F1 S1      | ENSP0000307006 | IRX2      | 471   | -1    | AAG G[G]A/C  | GAG  | 145         | G          | D                | Single AA Change | -6.92           | Deleterious       | 0               | Damaging  |                 |                |                 |
| 5   | 35790268  | G   | A   | F2 S2      | ENSP0000303843 |           |       |       |              |      |             |            |                  |                  |                 |                   |                 |           |                 |                |                 |

|    |           |   |   |         |     |                 |                 |      |    |                   |      |   |   |                  |       |             |       |           |
|----|-----------|---|---|---------|-----|-----------------|-----------------|------|----|-------------------|------|---|---|------------------|-------|-------------|-------|-----------|
| 8  | 30538444  | C | T | C151223 | S4  | ENSP00000221130 | GSR             | 522  | -1 | ATG [G/A]TTC TGT  | 466  | V | I | Single AA Change | -0.47 | Neutral     | 0.238 | Tolerated |
| 8  | 30699707  | A | G | A19557  | S7  | ENSP00000256246 | TEX15           | 2789 | -1 | AAT A/T/C/T CAT   | 2276 | I | T | Single AA Change | -0.37 | Neutral     | 0.796 | Tolerated |
| 8  | 87165102  | T | A | A11365  | S3  | ENSP00000285393 | ATP6V0D2        | 350  | 1  | GCA [T/A]AT GTA   | 317  | Y | N | Single AA Change | -5.99 | Deleterious | 0     | Damaging  |
| 8  | 100515147 | G | A | A20661  | S16 | ENSP00000351346 | VPS13B          | 4022 | 1  | ATA [G/A]AG AGT   | 1376 | E | K | Single AA Change | -0.84 | Neutral     | 0.231 | Tolerated |
| 8  | 10335670  | A | C | A19553  | S7  | ENSP00000429084 | UBR5            | 2799 | -1 | TCA AT/T/G AGT    | 551  | I | M | Single AA Change | -1.25 | Neutral     | 0.08  | Tolerated |
| 8  | 133083722 | A | G | A19552  | S9  | ENSP00000407107 | HHLA1           | 543  | -1 | CTC T/T/C/C AAG   | 481  | F | A | Single AA Change | -0.93 | Neutral     | 0.009 | Damaging  |
| 8  | 133492494 | G | C | A19552  | S12 | ENSP00000373648 | KCNQ3           | 872  | -1 | CGC [C/G]CA CAG   | 96   | P | S | Single AA Change | -1.12 | Neutral     | 0.039 | Damaging  |
| 8  | 143995831 | T | C | A20662  | S12 | ENSP00000325822 | CYP11B2         | 503  | -1 | GCT [G/A]G CAC    | 268  | D | G | Single AA Change | -4.8  | Deleterious | 0     | Damaging  |
| 8  | 144378779 | C | T | A19553  | S7  | ENSP00000328515 | ZNF696          | 374  | 1  | GAC [C/T]GC CGC   | 312  | R | C | Single AA Change | -5.08 | Deleterious | 0     | Damaging  |
| 9  | 1052032   | G | T | A12851  | S2  | ENSP00000305785 | DMRT2           | 561  | 1  | AAC [C/G]TTC TGC  | 140  | R | L | Single AA Change | -5.92 | Deleterious | 0     | Damaging  |
| 9  | 4605402   | T | A | M2      | S2  | ENSP00000404277 | C9orf68         | 392  | -1 | ATC [C/A]T/TG GAG | 345  | H | L | Single AA Change | -5.1  | Deleterious | 0     | Damaging  |
| 9  | 8449728   | G | A | A12851  | S2  | ENSP00000348812 | PTPRD           | 1912 | -1 | ACA [C/T]CG GGT   | 1529 | P | S | Single AA Change | -6.12 | Deleterious | 0     | Damaging  |
| 9  | 34557981  | C | A | A20661  | S2  | ENSP00000242338 | CNTRF           | 372  | -1 | GTC [T/G]T CCG    | 107  | L | F | Single AA Change | 0.91  | Neutral     | 0.601 | Tolerated |
| 9  | 78855540  | C | T | A19553  | S3  | ENSP00000446280 | PCSK5           | 1860 | 1  | GTC [T/T]AA GAG   | 1028 | Q | * | Nonsense         | NA    | NA          | NA    | NA        |
| 9  | 78947398  | C | T | A20661  | S2  | ENSP00000446280 | PCSK5           | 1860 | 1  | GAG [G/A]C/T AGC  | 1513 | D | D | Synonymous       | 0     | Neutral     | 0     | Tolerated |
| 9  | 86241370  | C | T | A20661  | S14 | ENSP00000434673 | C9orf103        | 106  | 1  | CTG T/T/C/G CCG   | 16   | L | L | Single AA Change | -2.05 | Neutral     | 0.357 | Tolerated |
| 9  | 98211436  | T | C | M2      | S4  | ENSP00000332353 | PTCH1           | 1447 | -1 | CGG [C/A]G CAC    | 1240 | H | R | Single AA Change | -1.39 | Neutral     | 0.518 | Tolerated |
| 9  | 102595675 | T | C | A20661  | S14 | ENSP00000331222 | NR4A3           | 637  | 1  | TGC A/T/C/G ATG   | 409  | M | T | Single AA Change | -3.44 | Deleterious | 0     | Damaging  |
| 9  | 112694221 | A | C | A13589  | S10 | ENSP00000363654 | PALM2-AKAP2     | 1103 | 1  | TAC [A/C]TTC CTT  | 137  | I | L | Single AA Change | -0.57 | Neutral     | 0.023 | Damaging  |
| 9  | 115421642 | C | T | M1      | S4  | ENSP00000440504 | KIAA1958        | 744  | 1  | ATT [C/T]GC CGA   | 510  | R | C | Single AA Change | 1.22  | Neutral     | 0.192 | Tolerated |
| 9  | 127572254 | G | A | A19552  | S3  | ENSP00000362682 | OLFML2A         | 623  | 1  | TAT [G/A]AG GAG   | 508  | E | K | Single AA Change | -3.27 | Deleterious | 0.03  | Damaging  |
| 9  | 130258259 | G | A | A19553  | S3  | ENSP00000300417 | LRSAM1          | 752  | 1  | GAG [C/G]A/C CAG  | 572  | R | H | Single AA Change | -0.78 | Neutral     | 0.243 | Tolerated |
| 9  | 130286100 | G | A | M2      | S1  | ENSP00000362409 | FAM129B         | 746  | -1 | AGT [G/C]T CCG    | 149  | A | A | Synonymous       | 0     | Neutral     | 1     | Tolerated |
| 9  | 133951251 | T | A | A20661  | S16 | ENSP00000347156 | LAMC3           | 1587 | 1  | GCC A/C/T/A GCT   | 1176 | T | A | Synonymous       | 0     | Neutral     | 0.92  | Tolerated |
| 10 | 8100451   | C | T | F2      | S3  | ENSP00000368632 | GATA3           | 444  | 1  | TTG T/C/T/G GGG   | 142  | S | L | Single AA Change | -2.33 | Neutral     | 0.094 | Tolerated |
| 10 | 52008300  | G | C | A19554  | S4  | ENSP00000378897 | ASAH2           | 780  | -1 | ATC [A/C]G/A GGT  | 24   | T | R | Single AA Change | -1.57 | Neutral     | 0.002 | Damaging  |
| 10 | 63852247  | G | A | M1      | S2  | ENSP00000279873 | ARID5B          | 1138 | 1  | GGG [G/A]CG CGG   | 1009 | A | T | Single AA Change | -0.67 | Neutral     | 0.001 | Damaging  |
| 10 | 70333116  | G | A | M2      | S1  | ENSP00000362748 | TET1            | 2186 | 1  | GGT [G/A]CT AAA   | 341  | A | T | Single AA Change | -0.86 | Neutral     | 0.162 | Tolerated |
| 10 | 75264630  | G | T | C151223 | S4  | ENSP00000345216 | USP54           | 1684 | -1 | GAA [G/C]A/T CCG  | 1430 | A | D | Single AA Change | -0.8  | Neutral     | 0.004 | Damaging  |
| 10 | 97116729  | C | T | A19553  | S4  | ENSP00000360272 | RP11-476E15.3.1 | 533  | -1 | ATT T/C/G/A GAA   | 36   | S | S | Synonymous       | 0     | Neutral     | 1     | Tolerated |
| 10 | 97181818  | A | G | F1      | S1  | ENSP00000355136 | SORBS1          | 1292 | -1 | AGG [C/T]C/T TTT  | 114  | L | P | Single AA Change | -3.4  | Deleterious | 0     | Tolerated |
| 10 | 101089965 | C | T | C151223 | S2  | ENSP00000349147 | CNNM1           | 901  | -1 | CAG [G/C]T/G GTT  | 274  | A | V | Single AA Change | -1.21 | Neutral     | 0.001 | Damaging  |
| 10 | 102685780 | T | G | F2      | S3  | ENSP00000359294 | FAM178A         | 788  | 1  | AGG T/T/T/G GTT   | 682  | F | P | Single AA Change | 1.27  | Neutral     | 1     | Tolerated |
| 10 | 103587690 | G | A | A19554  | S2  | ENSP00000420040 | KCNIP2          | 255  | -1 | GCA [C/T]TC CGC   | 235  | L | F | Single AA Change | -3.05 | Deleterious | 0     | Damaging  |
| 10 | 104459137 | T | A | M2      | S4  | ENSP00000260746 | ARL3            | 182  | -1 | ACC [G/A]T/TG ATT | 86   | D | V | Single AA Change | -8.45 | Deleterious | 0     | Damaging  |
| 10 | 112343279 | T | C | A19554  | S7  | ENSP00000354720 | SMC3            | 1217 | 1  | CAA [G/A]T/C GAA  | 314  | D | D | Synonymous       | 0     | Neutral     | 1     | Tolerated |
| 10 | 120085734 | C | T | A12851  | S11 | ENSP00000358170 | FAM204A         | 527  | -1 | ATA [C/G]A/C CAG  | 159  | D | N | Single AA Change | -2.55 | Deleterious | 0     | Damaging  |
| 10 | 12906708  | T | C | A19553  | S7  | ENSP00000357643 | MKI67           | 3256 | -1 | TTC [C/G]A/G CCA  | 1132 | P | P | Synonymous       | 0     | Neutral     | 1     | Tolerated |
| 11 | 562273    | C | T | A19552  | S7  | ENSP00000342726 | RASGEF7         | 373  | -1 | TGC [T/T]TA AIT   | 107  | L | L | Synonymous       | 0     | Neutral     | 1     | Tolerated |
| 11 | 13427289  | C | T | F2      | S3  | ENSP00000431186 | EBBD10          | 483  | -1 | GAA T/T/G/A CAT   | 316  | K | K | Single AA Change | -10.3 | Deleterious | 0     | Damaging  |
| 11 | 18332432  | T | C | F2      | S3  | ENSP00000265967 | HPS5            | 1129 | -1 | GGG AA[G/A] CCG   | 111  | C | K | Single AA Change | 0     | Synonymous  | 0     | Tolerated |
| 11 | 45931665  | G | A | A19553  | S7  | ENSP00000241041 | PEX16           | 346  | -1 | CCA [C/T]A/G CCG  | 339  | P | L | Single AA Change | -0.05 | Neutral     | 0     | Damaging  |
| 11 | 57319882  | T | C | A11365  | S2  | ENSP00000287156 | UBE2L6          | 153  | -1 | TTC A/G/A/G AAG   | 137  | R | R | Synonymous       | 0     | Neutral     | 0.395 | Tolerated |
| 11 | 58034921  | A | G | A20661  | S16 | ENSP00000378516 | OR10W1          | 305  | -1 | GTT [G/T]C/G GAA  | 137  | V | A | Single AA Change | -0.53 | Neutral     | 1     | Tolerated |
| 11 | 59611404  | G | A | F1      | S2  | ENSP00000257248 | GIF             | 417  | -1 | TAC AA[C/T] TTG   | 68   | N | N | Synonymous       | 0     | Neutral     | 1     | Tolerated |
| 11 | 61543837  | C | T | A19552  | S9  | ENSP00000278836 | C11orf9         | 1151 | 1  | GGG [C/T]G/G TGT  | 478  | R | W | Single AA Change | -7.65 | Deleterious | 0     | Damaging  |
| 11 | 64681874  | G | A | A19552  | S3  | ENSP00000410522 | ATG2A           | 1940 | -1 | CTG [C/T]T/ACC    | 90   | L | L | Synonymous       | 0     | Neutral     | 1     | Tolerated |
| 11 | 74574737  | A | G | A19552  | S3  | ENSP00000299563 | RNF169          | 708  | 1  | TTA [A/G]A/T CAT  | 597  | N | D | Single AA Change | -0.67 | Neutral     | 0.023 | Damaging  |
| 11 | 76072049  | C | T | A20661  | S14 | ENSP00000260045 | PRKRIR          | 707  | -1 | ACC A/G/A/T CAT   | 90   | S | N | Single AA Change | -1.26 | Neutral     | 0.014 | Damaging  |
| 11 | 86749116  | A | G | A19552  | S9  | ENSP00000306344 | TMEM135         | 458  | 1  | CTC [C/A]G/T AAT  | 10   | H | R | Single AA Change | -0.79 | Neutral     | 0.365 | Tolerated |
| 11 | 93862575  | G | T | A19552  | S9  | ENSP00000227638 | PANX1           | 426  | 1  | GTT [G/T]TCT GGC  | 33   | A | S | Single AA Change | -0.82 | Neutral     | 0.236 | Tolerated |
| 11 | 115085495 | A | T | A19552  | S9  | ENSP00000329797 | CADMI           | 471  | -1 | CTC [G/T]A/G ATC  | 276  | V | E | Single AA Change | 2.21  | Neutral     | 1     | Tolerated |
| 11 | 123601440 | G | A | A20661  | S16 | ENSP00000337724 | ZNF202          | 648  | -1 | TTC [C/T]G/C TAC  | 53   | R | C | Single AA Change | 0.03  | Neutral     | 0.122 | Tolerated |
| 11 | 123894447 | A | G | A19554  | S2  | ENSP00000364164 | OR10G9          | 311  | 1  | TCC [A/G]C/T GCT  | 243  | H | R | Single AA Change | -7.8  | Deleterious | 0     | Damaging  |
| 12 | 6554717   | C | G | A20661  | S9  | ENSP00000266557 | CD27            | 260  | 1  | TTT AA[C/G] TCT   | 88   | N | K | Single AA Change | -2.78 | Deleterious | 0     | Damaging  |
| 12 | 10046108  | G | A | A20661  | S16 | ENSP00000438244 | KLRF2           | 211  | 1  | TGC AT[G/A] TGG   | 149  | M | I | Single AA Change | -1.1  | Neutral     | 0.101 | Tolerated |
| 12 | 13906630  | C | T | M2      | S2  | ENSP00000279593 | GRIN2B          | 1484 | -1 | GAC [G/A]AT GGA   | 211  | D | N | Single AA Change | -2.1  | Neutral     | 0.156 | Tolerated |
| 12 | 32717218  | C | T | A12851  | S7  | ENSP00000449273 | FGD4            | 903  | 1  | AAG [C/T]A CAA    | 105  | P | L | Single AA Change | -3.51 | Deleterious | 0     | Damaging  |
| 12 | 40076714  | A | T | F1      | S3  | ENSP00000317671 | C12orf40        | 652  | 1  | GAT [A/T]TCT TGT  | 330  | T | S | Single AA Change | -1.19 | Neutral     | 0     | Tolerated |
| 12 | 46244505  | G | A | A13589  | S3  | ENSP00000355044 | ARID2           | 1835 | 1  | TCA [G/A]TA CAG   | 867  | V | P | Single AA Change | -0.36 | Neutral     | 0     | Damaging  |
| 12 | 49418427  | A | G | C151223 | S3  | ENSP00000301067 | MLL2            | 5537 | -1 | GAG [C/T]C/G CCA  | 5329 | L | P | Single AA Change | -6.72 | Deleterious | 0     | Damaging  |
| 12 | 52629007  | G | A | F2      | S3  | ENSP00000329243 | KRT7            | 469  | 1  | AAG TC[G/A] GCG   | 131  | S | S | Synonymous       | 0     | Neutral     | 0.448 | Tolerated |
| 12 | 52754670  | G | A | A19554  | S2  | ENSP00000257901 | KRT85           | 507  | -1 | TTC A/C/T/T GGC   | 497  | S | S | Synonymous       | 0     | Neutral     | 1     | Tolerated |
| 12 | 53941644  | C | T | A12851  | S4  | ENSP00000267119 | KRT71           | 523  | -1 | AAG AA[G/A] CAG   | 367  | K | K | Synonymous       | 0     | Neutral     | 1     | Tolerated |
| 12 | 52943122  | G | C | F2      | S3  | ENSP00000267119 | KRT71           | 523  | -1 | GAA A/T/G/A CAC   | 224  | I | L | Single AA Change | 0     | Neutral     | 1     | Tolerated |
| 12 | 53082888  | G | A | A19553  | S4  | ENSP00000342710 | KRT77           | 578  | -1 | CGT GA[C/G] TAC   | 448  | D | J | Single AA Change | 0.02  | Neutral     | 1     | Tolerated |
| 12 | 54106917  | G | T | A11365  | S3  | ENSP00000449960 | CALCOCO1        | 691  | -1 | CTT [C/C]A/T GAA  | 622  | P | H | Single AA Change | -2.13 | Neutral     | 0.011 | Damaging  |
| 12 | 54332796  | G | A | A19553  | S3  | ENSP00000243056 | HOX13           | 330  | 1  | GGG [G/A]G/C GGC  | 36   | G | S | Single AA Change | -0.2  | Neutral     | 0.38  | Tolerated |
| 12 | 56215823  | C | T | A20661  | S9  | ENSP00000316240 | DNAJC14         | 702  | -1 | ACA [G/A]TCA CCG  | 683  | V | I | Single AA Change | -0.41 | Neutral     | 0.144 | Tolerated |
| 12 | 56559279  | C | T | A20661  | S16 | ENSP00000449396 | SMARCC2         | 1245 | -1 | GCT [G/A]T/G GCT  | 1019 | V | M | Single AA Change | 0.11  | Neutral     | 0.185 | Tolerated |
| 12 | 57974739  | C | T | A19553  | S1  | ENSP00000408979 | KIF5A           | 1032 | 1  | CAG [C/T]T/G TCA  | 847  | L | L | Synonymous       | 0     | Neutral     | 1     | Tolerated |
| 12 | 91502646  | A | G | A19505  | S2  | ENSP00000266718 | LUM             | 338  | -1 | AAC T/G/T/C GCA   | 37   | C | C | Synonymous       | 0     | Neutral     | 1     | Tolerated |
| 12 | 102117102 | G | A | F2      | S1  | ENSP00000229266 | CHPT1           | 406  | 1  | TTA [G/A]T/G CTA  | 313  | V | M | Single AA Change | -2.73 | Deleterious | 0     | Damaging  |
| 12 | 104350514 | C | A | F2      | S3  | ENSP00000367330 | C12orf73        | 71   | -1 | AT[G/T] CCC       | 1    | M | I | Single AA Change | -3.77 | Deleterious | 0     | Damaging  |
| 12 | 112630465 | G | A | A19553  | S3  | ENSP00000449784 | C12orf51        | 4272 | -1 | TAC [C/T]G CCG    | 2918 | P | L | Single AA Change | -3.51 | Deleterious | 0     | Damaging  |
| 12 | 130847323 | C | T | A19505  | S7  | ENSP00000242555 | PIWIL1          | 861  | 1  | TCA C/G[C/T] TGC  | 661  | R | R | Synonymous       | 0     | Neutral     | 1     | Tolerated |
| 12 | 133810797 | C | T | A19552  | S3  | ENSP00000409950 | ACT26150.2.1    | 379  | -1 | GAC A/G/A/C CAG   | 49   | S | N | Single AA Change | -1.2  | Neutral     | 0.003 | Damaging  |
| 13 | 19751563  | G | T | A19553  | S4  | EN              |                 |      |    |                   |      |   |   |                  |       |             |       |           |

|    |          |   |   |            |                 |            |       |    |                    |      |   |   |                  |       |             |       |           |
|----|----------|---|---|------------|-----------------|------------|-------|----|--------------------|------|---|---|------------------|-------|-------------|-------|-----------|
| 16 | 67472983 | T | C | M1 S2      | ENSP00000441282 | ATP6V0D1   | 392   | -1 | GAG G/A/G/C CGT    | 277  | D | G | Single AA Change | -5.12 | Deleterious | 0.005 | Damaging  |
| 16 | 72139506 | G | C | A13589 S10 | ENSP00000268482 | DHX38      | 1227  | 1  | TCT [G/C]GT TAT    | 824  | E | R | Single AA Change | -7.37 | Deleterious | 0     | Damaging  |
| 16 | 77225429 | A | G | A13589 S3  | ENSP00000248248 | MON1B      | 547   | 1  | GCG G/A/G/G GAC    | 16   | E | G | Single AA Change | -0.96 | Neutral     | 0.006 | Damaging  |
| 16 | 84523014 | C | T | A11365 S3  | ENSP00000343635 | KIAA1609   | 456   | -1 | GAT CT[G/A] GTT    | 133  | L | L | Synonymous       | 0     | Neutral     | 1     | Tolerated |
| 16 | 85022431 | G | A | A20061 S14 | ENSP00000341681 | ZDHHCT     | 345   | -1 | GGG [C/T]TG GAC    | 122  | L | L | Synonymous       | 0     | Neutral     | 1     | Tolerated |
| 16 | 87446685 | C | T | A19552 S3  | ENSP00000268616 | ZCCHC14    | 949   | -1 | TCC [G/A]AC AGC    | 437  | D | N | Single AA Change | -1.73 | Neutral     | 0.002 | Damaging  |
| 17 | 2599795  | G | A | M2 S2      | ENSP00000320468 | KIAA0664   | 1310  | -1 | GCG TG[C/T] AAG    | 702  | C | C | Synonymous       | 0     | Neutral     | 1     | Tolerated |
| 17 | 4719200  | G | A | A12851 S7  | ENSP00000263088 | PLD2       | 933   | 1  | CTT [G/A]GA GAC    | 476  | G | R | Single AA Change | -4.27 | Deleterious | 0.001 | Damaging  |
| 17 | 4875547  | G | A | F2 S2      | ENSP00000412886 | CAMTA2     | 1241  | -1 | CAA [C/T]AG GCT    | 953  | Q | * | Nonsense         | NA    | NA          | NA    | NA        |
| 17 | 5486124  | A | G | A19552 S3  | ENSP00000269280 | NLRP1      | 1473  | -1 | CAC [T/T]CIG GGG   | 105  | L | P | Single AA Change | -1.92 | Neutral     | 0.004 | Damaging  |
| 17 | 7950975  | C | T | A19552 S9  | ENSP00000369530 | ALOX15B    | 676   | 1  | AGT G[C/T]A GGG    | 558  | A | V | Single AA Change | -2.43 | Neutral     | 0.003 | Damaging  |
| 17 | 9765339  | T | A | A20061 S9  | ENSP00000379509 | GLP2R      | 554   | 1  | GGG [T/A]IGC TGG   | 330  | C | S | Single AA Change | -9.32 | Deleterious | 0     | Damaging  |
| 17 | 10248858 | G | A | A19552 S1  | ENSP00000252172 | MYH13      | 1938  | -1 | AAC [C/T]AG CAG    | 447  | Q | * | Nonsense         | NA    | NA          | NA    | NA        |
| 17 | 17682065 | A | T | F2 S3      | ENSP00000438627 | SMCR5      | 140   | -1 | CCT [T/T]A GGC     | 109  | L | L | Synonymous       | 0     | Neutral     | NA    | NA        |
| 17 | 27959764 | G | T | A19552 S9  | ENSP00000444743 | SSH2       | 1450  | -1 | CTG [C/T]C[A] CTT  | 816  | L | L | Synonymous       | 0     | Neutral     | 0.264 | Tolerated |
| 17 | 31618815 | G | T | A20061 S9  | ENSP00000225823 | ACCN1      | 563   | -1 | AAC [C/A]IGC TTG   | 107  | R | S | Single AA Change | -3.72 | Deleterious | 0.054 | Tolerated |
| 17 | 36485967 | C | T | C151223 S3 | ENSP00000345060 | GPR179     | 2367  | -1 | ACC [A/G]A[AC] AGC | 1162 | S | N | Single AA Change | -1.56 | Neutral     | 0     | Damaging  |
| 17 | 36625519 | C | T | F1 S1      | ENSP00000393539 | ARHGAP23   | 1491  | 1  | GGA [C/T]IGC CAT   | 595  | R | C | Single AA Change | -5.5  | Deleterious | 0     | Damaging  |
| 17 | 39538458 | G | A | A20061 S2  | ENSP00000251648 | KRT34      | 436   | -1 | GCG [A/C]T[C] AGC  | 56   | T | I | Single AA Change | -2.32 | Neutral     | 0.017 | Damaging  |
| 17 | 43367953 | T | A | A19552 S3  | ENSP00000342059 | MAP3K14    | 946   | -1 | TGC GG[A/T] AAG    | 53   | G | G | Synonymous       | 0     | Neutral     | 1     | Tolerated |
| 17 | 43922875 | C | A | A19552 S12 | ENSP00000332488 | AC217771.1 | 684   | 1  | GCA GG[G/C]A GGC   | 201  | G | G | Synonymous       | 0     | Neutral     | 1     | Tolerated |
| 17 | 46132474 | C | T | A11365 S1  | ENSP00000445811 | NFE2L1     | 616   | 1  | GCC [C/T]AG CCC    | 32   | Q | * | Nonsense         | NA    | NA          | NA    | NA        |
| 17 | 46703346 | G | A | A13589 S10 | ENSP00000309439 | HOXB9      | 250   | -1 | CTC [C/T]GG ACC    | 96   | R | C | Single AA Change | -6.61 | Deleterious | 0     | Damaging  |
| 17 | 46993534 | G | A | A19552 S1  | ENSP00000354201 | UBE2Z      | 354   | 1  | AAT GA[G/A] CCC    | 225  | E | E | Synonymous       | 0     | Neutral     | 1     | Tolerated |
| 17 | 50602616 | C | A | A19554 S8  | ENSP00000258963 | VEZF1      | 521   | -1 | AAT [C/G]T[A] CAC  | 191  | R | L | Single AA Change | -6.72 | Deleterious | 0.033 | Damaging  |
| 17 | 70645336 | G | A | A13589 S9  | ENSP00000445829 | SLC39A11   | 342   | -1 | GAG G[C/T]A GGC    | 255  | A | V | Single AA Change | -2.47 | Neutral     | 0.042 | Damaging  |
| 17 | 73237531 | C | T | A19554 S2  | ENSP00000245541 | GGA3       | 723   | -1 | GAA [G/G]A[G] CAG  | 299  | G | E | Single AA Change | -5.72 | Deleterious | 0.074 | Tolerated |
| 18 | 67684672 | G | C | A19505 S8  | ENSP00000256774 | RTTN       | 2226  | -1 | AGC [C/C]G[T] GCA  | 2131 | P | R | Single AA Change | -1.6  | Neutral     | 0.072 | Tolerated |
| 19 | 2221166  | G | A | A20061 S2  | ENSP00000221482 | DOT1L      | 1740  | 1  | CCT [G/A]CC TCT    | 1000 | A | T | Single AA Change | -1.2  | Neutral     | 0.014 | Damaging  |
| 19 | 2251673  | T | G | A13589 S3  | ENSP00000221496 | AMH        | 560   | 1  | TGC [C/T]G[AC] AGC | 467  | L | R | Single AA Change | -5.68 | Deleterious | 0     | Damaging  |
| 19 | 4354106  | G | A | C70007 S10 | ENSP00000262966 | MPND       | 471   | 1  | ATG [C/T]G[A] GGC  | 243  | L | L | Synonymous       | 0     | Neutral     | 1     | Tolerated |
| 19 | 5456606  | C | T | A12851 S4  | ENSP00000222033 | ZNRF4      | 429   | 1  | TAC AG[C/T] TTC    | 368  | S | S | Synonymous       | 0     | Neutral     | 1     | Tolerated |
| 19 | 7172411  | G | A | A19554 S4  | ENSP00000303830 | INSR       | 1382  | -1 | CTC GG[C/T] CTC    | 386  | G | G | Synonymous       | 0     | Neutral     | 1     | Tolerated |
| 19 | 8056686  | T | A | A12851 S7  | ENSP00000264073 | ELAVL1     | 353   | -1 | GTC [T/A]T[T] GAA  | 32   | Y | F | Single AA Change | -0.8  | Neutral     | 0.467 | Tolerated |
| 19 | 9074112  | G | A | A12851 S7  | ENSP00000381008 | MUC16      | 14507 | -1 | CCT [C/C]T[C] TCT  | 4445 | P | L | Single AA Change | -2.41 | Neutral     | 0.004 | Damaging  |
| 19 | 10097414 | G | A | A20061 S14 | ENSP00000264828 | COL5A3     | 1745  | -1 | CGG GG[C/T] CTC    | 722  | G | G | Synonymous       | 0     | Neutral     | 1     | Tolerated |
| 19 | 15549915 | G | A | A12851 S7  | ENSP00000373933 | WIZ        | 1651  | -1 | ACC [C/C]T GAG     | 582  | S | S | Synonymous       | 0     | Neutral     | 1     | Tolerated |
| 19 | 18331076 | G | A | F1 S3      | ENSP00000442663 | PDE4C      | 821   | -1 | CGC [C/C]T GGG     | 363  | S | S | Synonymous       | 0     | Neutral     | 1     | Tolerated |
| 19 | 19038632 | A | T | A11365 S3  | ENSP00000247003 | DDX49      | 483   | 1  | ACA [C/A]T[G] GTC  | 387  | Q | L | Single AA Change | -4.84 | Deleterious | 0.01  | Damaging  |
| 19 | 31770312 | G | A | M1 S2      | ENSP00000240587 | TSHZ3      | 1081  | -1 | AAC [C/C]T[C] GAC  | 129  | S | S | Synonymous       | 0     | Neutral     | 0     | Damaging  |
| 19 | 36120554 | C | G | A20061 S16 | ENSP00000262633 | RBM42      | 480   | 1  | ATT [T/C]G[G] TCC  | 87   | I | M | Single AA Change | -0.9  | Neutral     | 0     | Damaging  |
| 19 | 41073572 | G | A | F2 S3      | ENSP00000263373 | SPTBN4     | 2564  | 1  | ATC [G/A]AG AAA    | 2114 | E | K | Single AA Change | -2.5  | Deleterious | 0.063 | Tolerated |
| 19 | 44117140 | G | A | A13589 S6  | ENSP00000432514 | SRRM5      | 730   | 1  | AGA AG[G/A]TCA     | 304  | R | R | Synonymous       | 0     | Neutral     | 1     | Tolerated |
| 19 | 51504410 | C | T | A20061 S14 | ENSP00000375682 | KLK8       | 305   | -1 | CCC [C/G]A[AC] CCT | 5    | R | Q | Single AA Change | -0.03 | Neutral     | 0.106 | Tolerated |
| 19 | 51602294 | C | T | A19553 S7  | ENSP00000390011 | CTU1       | 348   | -1 | GAG G[G/A]G GGC    | 204  | G | E | Single AA Change | -0.07 | Neutral     | 0.451 | Tolerated |
| 19 | 54756825 | C | T | A19554 S8  | ENSP00000414225 | LILRB5     | 622   | -1 | GTT [G/T]A[AC] ACT | 452  | V | V | Synonymous       | 0     | Neutral     | 0.581 | Tolerated |
| 19 | 55451097 | C | T | A19552 S1  | ENSP00000414273 | NLRP7      | 1065  | -1 | CCC [G/A]C[G] GTG  | 392  | A | T | Single AA Change | -1.44 | Neutral     | 0.413 | Tolerated |
| 19 | 57005558 | T | G | A19553 S4  | ENSP00000299997 | AC004696.1 | 76    | 1  | ATG [A/T]G[C] GCA  | 2    | I | S | Single AA Change | -2    | Neutral     | 0     | Damaging  |
| 19 | 58420358 | G | A | A19553 S3  | ENSP00000311319 | ZNF417     | 575   | -1 | CTT [C/T]A[AC] ACT | 430  | H | Y | Single AA Change | -5.9  | Deleterious | 0     | Damaging  |
| 19 | 58420399 | G | A | A19553 S3  | ENSP00000311319 | ZNF417     | 575   | -1 | AAA [T/C]T[A] TTT  | 416  | S | L | Single AA Change | -2.87 | Deleterious | 0.133 | Tolerated |
| 19 | 58926982 | C | A | A20061 S9  | ENSP00000306756 | ZNF584     | 421   | 1  | GTC AG[C/A] AGA    | 87   | S | R | Single AA Change | -0.34 | Neutral     | 0.55  | Tolerated |
| 20 | 37377482 | G | T | A20061 S14 | ENSP00000243903 | ACTR5      | 675   | 1  | CTG [G/T]G[T] GTC  | 121  | G | C | Single AA Change | -8.22 | Deleterious | 0     | Damaging  |
| 20 | 40040816 | C | T | A20061 S14 | ENSP00000362330 | CHD6       | 2715  | -1 | AGA [G/A]T[T] CCT  | 2407 | V | I | Single AA Change | -0.75 | Neutral     | 0     | Damaging  |
| 20 | 43541343 | G | T | M2 S1      | ENSP00000217073 | PABPC1L    | 614   | 1  | AAA [G/G]T[C] CAG  | 79   | G | V | Single AA Change | -8.04 | Deleterious | 0     | Damaging  |
| 20 | 47991214 | C | T | F2 S3      | ENSP00000360806 | KCNB1      | 858   | -1 | GCC [G/A]T[G] GTC  | 295  | V | M | Single AA Change | -2.82 | Deleterious | 0     | Damaging  |
| 20 | 50140350 | C | A | A20061 S9  | ENSP00000379330 | NFATC2     | 925   | -1 | GCC [G/T]G[G] GTC  | 144  | G | W | Single AA Change | -0.98 | Neutral     | 0.316 | Tolerated |
| 20 | 58318314 | A | G | A20061 S9  | ENSP00000360054 | PHACTR3    | 559   | 1  | CAG [A/G]C[A] ACG  | 91   | T | A | Single AA Change | -3.71 | Deleterious | 0.005 | Damaging  |
| 20 | 62594513 | A | G | A19552 S9  | ENSP00000217130 | ZNF512B    | 892   | -1 | CAC [T/C]G[T] GGC  | 635  | C | R | Single AA Change | -10.7 | Deleterious | 0.001 | Damaging  |
| 21 | 35186297 | G | A | A19552 S1  | ENSP00000370685 | ITSN1      | 1721  | 1  | CCA [G/A]G GGC     | 883  | S | N | Single AA Change | -1.02 | Neutral     | 0.031 | Damaging  |
| 21 | 38877699 | G | A | A19552 S12 | ENSP00000381932 | DYRK1A     | 763   | 1  | TTG AA[G/A]T TC    | 451  | K | K | Synonymous       | 0     | Neutral     | 1     | Tolerated |
| 22 | 20126721 | C | G | A12851 S4  | ENSP00000384716 | ZDHHCT     | 778   | 1  | TGC [C/G]C[G] TGC  | 37   | P | A | Single AA Change | -5.19 | Deleterious | 0.016 | Damaging  |
| 22 | 26317227 | G | A | A19552 S12 | ENSP00000386096 | MYO18B     | 2568  | 1  | ATT [G/A]G[C] CAT  | 179  | G | S | Single AA Change | -3.33 | Deleterious | 0.111 | Tolerated |
| 22 | 51017936 | C | G | A20061 S9  | ENSP00000384400 | CHKB       | 395   | -1 | AGT CG[G/C]T CAT   | 344  | R | R | Synonymous       | 0     | Neutral     | 1     | Tolerated |
